# Supplementary material for: Molecular Evolution of Lysine Biosynthesis in Agaricomycetes
Source: MDPI journal article supplement (doi:10.3390/jof8010037), 2021-12-31
Supplement: s1 [file s1]

## Supplementary data

# Molecular evolution of lysine biosynthesis in Agaricomycetes

Zili Song <sup>1,2</sup>, Maoqiang He <sup>1</sup>, Ruilin Zhao <sup>1</sup>, Landa Qi <sup>3</sup>, Guocan Chen <sup>3</sup>, Wen-Bing Yin <sup>1, 2\*</sup>  
and Wei Li <sup>1, 2\*</sup>

<sup>1</sup> State Key Laboratory of Mycology, Institute of Microbiology, Chinese Academy of Sciences; Beijing 100101, P. R. China

<sup>2</sup> Savaid Medical School, University of Chinese Academy of Sciences, Beijing 100049, P. R. China

<sup>3</sup> Henan Academy of Science Institute of Biology, Zhengzhou 450008, P. R. China

\*Correspondence: [yinwb@im.ac.cn](mailto:yinwb@im.ac.cn) (W.-B.Y.), [liw@im.ac.cn](mailto:liw@im.ac.cn) (W. L.); Tel.: +86-10-6480-6170

**Table S1.** The homologous sequences of HCS used to construct the phylogenetic tree in this study.

| Order                    | Family           | Strains                           | Accession number | Pssm-ID | Cd length | Bit score | Conserved domains Interval | E-value  |
|--------------------------|------------------|-----------------------------------|------------------|---------|-----------|-----------|----------------------------|----------|
| Agaricales <sup>a</sup>  | Tricholomataceae | <i>Tricholoma matsutake</i>       | KAF8222095.1     | 163685  | 262       | 533.83    | 64-325                     | 0.00E+00 |
|                          | Cortinariaceae   | <i>Cortinarius glaucopus</i>      | KAF8802540.1     | 163685  | 262       | 532.68    | 68-329                     | 0.00E+00 |
|                          | Pluteaceae       | <i>Pluteus cervinus</i>           | TFK72970.1       | 163685  | 262       | 530.37    | 66-327                     | 0.00E+00 |
|                          | Strophariaceae   | <i>Pholiota molesta</i>           | KAF8199646.1     | 163685  | 262       | 531.52    | 70-331                     | 0.00E+00 |
|                          | Hymenogastraceae | <i>Gymnopilus junonius</i>        | KAF8907336.1     | 163685  | 262       | 531.14    | 72-333                     | 0.00E+00 |
|                          | Pterulaceae      | <i>Pterula gracilis</i>           | TFK98677.1       | 163685  | 262       | 538.46    | 61-322                     | 0.00E+00 |
|                          | Psathyrellaceae  | <i>Coprinopsis marcescibilis</i>  | TFK27163.1       | 163685  | 262       | 532.29    | 68-329                     | 0.00E+00 |
|                          | Psathyrellaceae  | <i>Coprinopsis cinerea</i>        | XP_001836353.1   | 163685  | 262       | 535.37    | 82-343                     | 0.00E+00 |
|                          | Psathyrellaceae  | <i>Coprinellus angulatus</i>      | KAF6757197.1     | 163685  | 262       | 531.52    | 70-331                     | 0.00E+00 |
|                          | Psathyrellaceae  | <i>Coprinellus micaceus</i>       | TEB35407.1       | 163685  | 262       | 531.14    | 68-329                     | 0.00E+00 |
|                          | Mycenaceae       | <i>Mycena galopus</i>             | KAF8207270.1     | 163685  | 262       | 532.29    | 69-330                     | 0.00E+00 |
|                          | Omphalotaceae    | <i>Gymnopus androsaceus</i>       | KAE9408410.1     | 163685  | 262       | 516.11    | 64-319                     | 0.00E+00 |
|                          | Physalacriaceae  | <i>Flammulina velutipes</i>       | AGG53996.1       | 163685  | 262       | 538.07    | 59-320                     | 0.00E+00 |
|                          | Physalacriaceae  | <i>Cylindrobasidium torrendii</i> | KIY65962.1       | 163685  | 262       | 533.83    | 61-322                     | 0.00E+00 |
|                          | Physalacriaceae  | <i>Armillaria solidipes</i>       | PBK75543.1       | 163685  | 262       | 530.75    | 67-328                     | 0.00E+00 |
|                          | Physalacriaceae  | <i>Armillaria gallica</i>         | PBL03758.1       | 163685  | 262       | 531.14    | 67-328                     | 0.00E+00 |
|                          | Omphalotaceae    | <i>Lentinula edodes</i>           | GAW01978.1       | 163685  | 262       | 541.15    | 593-854                    | 0.00E+00 |
| Polyporales <sup>a</sup> | Polyporaceae     | <i>Trametes coccinea</i>          | OSD06237.1       | 163685  | 262       | 533.45    | 82-343                     | 0.00E+00 |
|                          | Polyporaceae     | <i>Trametes versicolor</i>        | EIW63959.1       | 163685  | 262       | 529.6     | 58-319                     | 0.00E+00 |
|                          | Polyporaceae     | <i>Dichomitus squalens</i>        | XP_007359783.1   | 163685  | 262       | 533.06    | 77-338                     | 0.00E+00 |
|                          | Polyporaceae     | <i>Ganoderma boninense</i>        | VWO94054.1       | 163685  | 262       | 536.53    | 72-333                     | 0.00E+00 |
|                          | Polyporaceae     | <i>Polyporus arcularius</i>       | TFK88646.1       | 163685  | 262       | 534.99    | 73-334                     | 0.00E+00 |
|                          | Polyporaceae     | <i>Polyporus brumalis</i>         | RDX51874.1       | 163685  | 262       | 534.99    | 73-334                     | 0.00E+00 |

|                               |                     |                                        |                |        |     |        |        |          |
|-------------------------------|---------------------|----------------------------------------|----------------|--------|-----|--------|--------|----------|
|                               | Polyporaceae        | <i>Lentinus tigrinus</i>               | RPD82212.1     | 163685 | 262 | 534.6  | 67-328 | 0.00E+00 |
|                               | Stereaceae          | <i>Stereum hirsutum</i>                | EIM91005.1     | 163685 | 262 | 529.6  | 56-317 | 0.00E+00 |
|                               | Russulaceae         | <i>Lactarius quietus</i>               | KAF8274751.1   | 163685 | 262 | 529.6  | 62-323 | 0.00E+00 |
| Russulales <sup>a</sup>       | Russulaceae         | <i>Russula ochroleuca</i>              | KAF8485787.1   | 163685 | 262 | 527.67 | 70-331 | 0.00E+00 |
|                               | Russulaceae         | <i>Russula emetica</i>                 | KAF8501388.1   | 163685 | 262 | 534.6  | 65-326 | 0.00E+00 |
|                               | Hydnodontaceae      | <i>Peniophora</i> sp.                  | KZV64376.1     | 163685 | 262 | 532.68 | 53-314 | 0.00E+00 |
|                               | Rickenellaceae      | <i>Rickenella mellea</i>               | TDL17906.1     | 163685 | 262 | 526.9  | 67-328 | 0.00E+00 |
|                               | Hymenochaetaceae    | <i>Pyrrhoderma noxium</i>              | PAV16546.1     | 163685 | 262 | 531.52 | 63-324 | 0.00E+00 |
| Hymenochaetales <sup>a</sup>  | Hymenochaetaceae    | <i>Fomitiporia mediterranea</i>        | XP_007262891.1 | 163685 | 262 | 528.06 | 59-320 | 0.00E+00 |
|                               | Hymenochaetaceae    | <i>Sanghuangporus baumii</i>           | OCB85311.1     | 163685 | 262 | 526.9  | 61-322 | 0.00E+00 |
|                               | Schizoporaceae      | <i>Schizopora paradoxa</i>             | KLO12763.1     | 163685 | 262 | 530.75 | 73-334 | 0.00E+00 |
| Gomphales <sup>a</sup>        | Gomphaceae          | <i>Ramaria rubella</i>                 | KAF8591094.1   | 163685 | 262 | 529.98 | 65-325 | 0.00E+00 |
|                               | Auriculariaceae     | <i>Auricularia subglabra</i>           | EJD49060.1     | 163685 | 262 | 538.07 | 61-322 | 0.00E+00 |
| Auriculariales <sup>a</sup>   | Auriculariaceae     | <i>Exidia glandulosa</i>               | KZV97461.1     | 163685 | 262 | 519.97 | 42-313 | 0.00E+00 |
|                               | Hydnaceae           | <i>Clavulina</i> sp.                   | KAF8309935.1   | 163685 | 262 | 535.76 | 54-314 | 0.00E+00 |
| Cantharellales <sup>a</sup>   | Hydnaceae           | <i>Cantharellus anzutake</i>           | KAF8339827.1   | 163685 | 262 | 523.43 | 46-306 | 0.00E+00 |
|                               | Dipodascaceae       | <i>Trichosporon asahii</i>             | XP_014181037.1 | 163685 | 262 | 535.76 | 54-316 | 0.00E+00 |
| Trichosporonales <sup>b</sup> | Trichosporonaceae   | <i>Cutaneotrichosporon oleaginosum</i> | XP_018282260.1 | 163685 | 262 | 538.07 | 57-319 | 0.00E+00 |
|                               | Trimorphomycetaceae | <i>Saitozyma</i> sp.                   | GFZ49222.1     | 163685 | 262 | 518.81 | 75-327 | 0.00E+00 |
| Tremellales <sup>b</sup>      | Mrakiaceae          | <i>Phaffia rhodozyma</i>               | CDZ98541.1     | 163685 | 262 | 532.29 | 74-336 | 0.00E+00 |

**Note:** “a”: Agaricomycetes, “b”: Tremellomycetes. Function description: Homocitrate synthase (HCS) catalyzes the condensation of acetyl-CoA and  $\alpha$ -ketoglutarate to homocitrate, the first step in the lysine biosynthesis pathway. The HCS of all strains belong to the DRE-TIM metallolyase superfamily (Accession: cd07948).

**Table S2.** The homologous sequences of HCS used to construct the phylogenetic tree in this study.

| Order                   | Family           | Strains                            | Accession number | Pssm-ID | Cd length | Bit score | Conserved domains Interval | E-value  |
|-------------------------|------------------|------------------------------------|------------------|---------|-----------|-----------|----------------------------|----------|
| Agaricales <sup>a</sup> | Physalacriaceae  | <i>Armillaria gallica</i>          | PBK98805.1       | 274582  | 1389      | 2041.16   | 14-1425                    | 0.00E+00 |
|                         | Physalacriaceae  | <i>Armillaria solidipes</i>        | PBK70829.1       | 274582  | 1389      | 2060.42   | 10-1421                    | 0.00E+00 |
|                         | Nidulariaceae    | <i>Cyathus striatus</i>            | KAF8999093.1     | 274582  | 1389      | 1879.76   | 8-1348                     | 0.00E+00 |
|                         | Psathyrellaceae  | <i>Coprinellus angulatus</i>       | KAF6757844.1     | 274582  | 1389      | 2028.45   | 8-1435                     | 0.00E+00 |
|                         | Psathyrellaceae  | <i>Coprinellus micaceus</i>        | TEB29768.1       | 274582  | 1389      | 2062.73   | 331-1750                   | 0.00E+00 |
|                         | Amanitaceae      | <i>Amanita rubescens</i>           | KAF8345359.1     | 274582  | 1389      | 2040.39   | 8-1426                     | 0.00E+00 |
|                         | Tricholomataceae | <i>Infundibulicybe gibba</i>       | KAF8886556.1     | 274582  | 1389      | 1954.49   | 8-1359                     | 0.00E+00 |
|                         | Agaricaceae      | <i>Macrolepiota fuliginosa</i>     | KAF9447151.1     | 274582  | 1389      | 2046.94   | 10-1428                    | 0.00E+00 |
|                         | Pluteaceae       | <i>Pluteus cervinus</i>            | TFK71908.1       | 274582  | 1389      | 2032.69   | 8-1427                     | 0.00E+00 |
|                         | Nidulariaceae    | <i>Crucibulum laeve</i>            | TFK37590.1       | 274582  | 1389      | 1956.8    | 8-1393                     | 0.00E+00 |
|                         | Crassisporiaceae | <i>Crassisporium funariophilum</i> | KAF8157006.1     | 274582  | 1389      | 2062.35   | 8-1427                     | 0.00E+00 |
|                         | Strophariaceae   | <i>Agrocybe pediades</i>           | KAF9564472.1     | 274582  | 1389      | 2056.57   | 8-1415                     | 0.00E+00 |
|                         | Hymenogastraceae | <i>Flammula alnicola</i>           | KAF8970209.1     | 274582  | 1389      | 2034.23   | 8-1430                     | 0.00E+00 |
|                         | Strophariaceae   | <i>Pholiota conissans</i>          | KAF9482698.1     | 274582  | 1389      | 2055.03   | 8-1427                     | 0.00E+00 |
|                         | Strophariaceae   | <i>Pholiota molesta</i>            | KAF8180379.1     | 274582  | 1389      | 1716.44   | 8-1208                     | 0.00E+00 |
|                         | Psathyrellaceae  | <i>Panaeolus papilionaceus</i>     | KAF9041288.1     | 274582  | 1389      | 2060.8    | 12-1431                    | 0.00E+00 |
|                         | Hydnangiaceae    | <i>Laccaria bicolor</i>            | XP_001879618.1   | 274582  | 1389      | 2059.65   | 8-1419                     | 0.00E+00 |
|                         | Lyophyllaceae    | <i>Hypsizygus marmoreus</i>        | RDB30310.1       | 274582  | 1389      | 2051.56   | 8-1420                     | 0.00E+00 |
|                         | Lyophyllaceae    | <i>Lyophyllum atratum</i>          | KAF8067844.1     | 274582  | 1389      | 2050.79   | 8-1414                     | 0.00E+00 |
|                         | Tricholomataceae | <i>Tricholoma matsutake</i>        | KAF8223431.1     | 274582  | 1389      | 2025.37   | 12-1407                    | 0.00E+00 |
|                         | Tricholomataceae | <i>Lepista nuda</i>                | KAF9459773.1     | 274582  | 1389      | 2036.54   | 8-1416                     | 0.00E+00 |
|                         | Mycenaceae       | <i>Mycena indigotica</i>           | XP_037213600.1   | 274582  | 1389      | 2023.44   | 429-1847                   | 0.00E+00 |
|                         | Mycenaceae       | <i>Mycena chlorophos</i>           | KAF7300613.1     | 274582  | 1389      | 2013.81   | 10-1400                    | 0.00E+00 |
| Boletales <sup>a</sup>  | Paxillaceae      | <i>Gyrodon lividus</i>             | KAF9226319.1     | 274582  | 1389      | 1984.15   | 8-1437                     | 0.00E+00 |

|                                  |                 |                              |                |        |      |         |         |          |
|----------------------------------|-----------------|------------------------------|----------------|--------|------|---------|---------|----------|
|                                  | Boletaceae      | <i>Xerocomus badius</i>      | KAF8553785.1   | 274582 | 1389 | 2001.1  | 8-1437  | 0.00E+00 |
|                                  | Suillaceae      | <i>Suillus brevipes</i>      | KAF3875411.1   | 274582 | 1389 | 1989.54 | 8-1432  | 0.00E+00 |
| Gloeophyllales <sup>a</sup>      | Gloeophyllaceae | <i>Neolentinus lepideus</i>  | KZT28090.1     | 274582 | 1389 | 2055.41 | 12-1418 | 0.00E+00 |
|                                  | Gloeophyllaceae | <i>Heliocybe sulcata</i>     | TFK49407.1     | 274582 | 1389 | 2090.85 | 11-1421 | 0.00E+00 |
|                                  | Gloeophyllaceae | <i>Gloeophyllum trabeum</i>  | XP_007867945.1 | 274582 | 1389 | 2076.21 | 12-1424 | 0.00E+00 |
| Polyporales <sup>a</sup>         | Laetiporaceae   | <i>Laetiporus sulphureus</i> | KZT10254.1     | 274582 | 1389 | 2066.97 | 8-1426  | 0.00E+00 |
|                                  | Fomitopsidaceae | <i>Daedalea quercina</i>     | KZT70440.1     | 274582 | 1389 | 2046.17 | 8-1420  | 0.00E+00 |
|                                  | Polyporaceae    | <i>Lentinus tigrinus</i>     | RPD65725.1     | 274582 | 1389 | 2092.78 | 11-1428 | 0.00E+00 |
|                                  | Polyporaceae    | <i>Polyporus brumalis</i>    | RDX54732.1     | 274582 | 1389 | 2112.04 | 10-1432 | 0.00E+00 |
|                                  | Polyporaceae    | <i>Dichomitus squalens</i>   | TBU61097.1     | 274582 | 1389 | 2053.1  | 11-1427 | 0.00E+00 |
| Russulales <sup>a</sup>          | Stereaceae      | <i>Stereum hirsutum</i>      | XP_007309010.1 | 274582 | 1389 | 2062.35 | 11-1425 | 0.00E+00 |
|                                  | Hericiaceae     | <i>Dentipellis</i> sp.       | KAA1473026.1   | 274582 | 1389 | 2066.97 | 11-1418 | 0.00E+00 |
|                                  | Russulaceae     | <i>Russula ochroleuca</i>    | KAF8480159.1   | 274582 | 1389 | 1982.22 | 11-1423 | 0.00E+00 |
|                                  | Russulaceae     | <i>Russula emetica</i>       | KAF8491911.1   | 274582 | 1389 | 1949.87 | 11-1414 | 0.00E+00 |
|                                  | Russulaceae     | <i>Lactarius quietus</i>     | KAF8271296.1   | 274582 | 1389 | 1972.21 | 11-1419 | 0.00E+00 |
|                                  | Peniophoraceae  | <i>Peniophora</i> sp.        | KZV74202.1     | 274582 | 1389 | 2024.6  | 11-1410 | 0.00E+00 |
| Cantharellales <sup>a</sup>      | Hydnaceae       | <i>Clavulina</i> sp.         | KAF8318757.1   | 274582 | 1389 | 2026.52 | 11-1409 | 0.00E+00 |
| Cystofilobasidiales <sup>b</sup> | Mrakiaceae      | <i>Phaffia rhodozyma</i>     | CDZ96380.1     | 274582 | 1389 | 2067.35 | 13-1437 | 0.00E+00 |

Note: “a”: Agaricomycetes, “b”: Tremellomycetes. Function description:  $\alpha$ -Amino adipate reductase (AAR) catalyzes the reduction of  $\alpha$ -amino adipate to semialdehyde. The AAR of all strains belong to the alpha\_am\_amid superfamily (Accession: cl27680).

**Table S3.** The homologous sequences of HCS used to construct the phylogenetic tree in this study.

| Order                   | Family           | Strains                            | GenBank No.    | Pssm-ID | Cd Length | Bit Score | Accession | Interval | E-value  |
|-------------------------|------------------|------------------------------------|----------------|---------|-----------|-----------|-----------|----------|----------|
| Agaricales <sup>a</sup> | Lyophyllaceae    | <i>Hypsizygus marmoreus</i>        | RDB29103.1     | 240664  | 351       | 535.66    | cd12188   | 33-385   | 0.00E+00 |
|                         | Tricholomataceae | <i>Tricholoma matsutake</i>        | KAF8223463.1   | 240664  | 351       | 533.73    | cd12188   | 6-360    | 0.00E+00 |
|                         | Tricholomataceae | <i>Lepista nuda</i>                | KAF9457093.1   | 240664  | 351       | 513.7     | cd12188   | 5-355    | 0.00E+00 |
|                         | Mycenaceae       | <i>Mycena galopus</i>              | KAF8213335.1   | 240664  | 351       | 550.3     | cd12188   | 4-360    | 0.00E+00 |
|                         | Marasmiaceae     | <i>Marasmius fiardii</i>           | KAF9270414.1   | 240664  | 351       | 535.27    | cd12188   | 4-360    | 0.00E+00 |
|                         | Pleurotaceae     | <i>Pleurotus ostreatus</i>         | XP_036634909.1 | 240664  | 351       | 555.69    | cd12188   | 4-360    | 0.00E+00 |
|                         | Pleurotaceae     | <i>Pleurotus pulmonarius</i>       | KAF4605402.1   | 240664  | 351       | 550.68    | cd12188   | 4-360    | 0.00E+00 |
|                         | Agaricaceae      | <i>Macrolepiota fuliginosa</i>     | KAF9454889.1   | 240664  | 351       | 557.23    | cd12188   | 4-361    | 0.00E+00 |
|                         | Agaricaceae      | <i>Leucoagaricus</i> sp.           | KXN89843.1     | 240664  | 351       | 563.01    | cd12188   | 4-365    | 0.00E+00 |
|                         | Psathyrellaceae  | <i>Coprinosporia marcescibilis</i> | TFK30628.1     | 240664  | 351       | 541.05    | cd12188   | 4-360    | 0.00E+00 |
|                         | Marasmiaceae     | <i>Moniliophthora roreri</i>       | ESK98395.1     | 240664  | 351       | 545.29    | cd12188   | 4-359    | 0.00E+00 |
|                         | Crassisporiaceae | <i>Crassisporium funariophilum</i> | KAF8167912.1   | 240664  | 351       | 536.82    | cd12188   | 4-360    | 0.00E+00 |
|                         | Nidulariaceae    | <i>Crucibulum laeve</i>            | TFK40972.1     | 240664  | 351       | 554.15    | cd12188   | 4-360    | 0.00E+00 |
|                         | Bolbitiaceae     | <i>Panaeolus papilionaceus</i>     | KAF9056365.1   | 240664  | 351       | 556.46    | cd12188   | 4-360    | 0.00E+00 |
|                         | Cortinariaceae   | <i>Gymnopilus junonius</i>         | KAF8912853.1   | 240664  | 351       | 538.36    | cd12188   | 39-395   | 0.00E+00 |
|                         | Physalacriaceae  | <i>Flammulina velutipes</i>        | QCX08356.1     | 240664  | 351       | 569.17    | cd12188   | 4-360    | 0.00E+00 |
|                         | Physalacriaceae  | <i>Armillaria gallica</i>          | PBL00798.1     | 240664  | 351       | 573.41    | cd12188   | 4-360    | 0.00E+00 |
|                         | Physalacriaceae  | <i>Armillaria solidipes</i>        | PBK77012.1     | 240664  | 351       | 573.41    | cd12188   | 4-360    | 0.00E+00 |
|                         | Physalacriaceae  | <i>Guyanagaster necrorrhizus</i>   | KAG7450318.1   | 240664  | 351       | 571.1     | cd12188   | 4-360    | 0.00E+00 |
| Boletales <sup>a</sup>  | Suillaceae       | <i>Suillus spraguei</i>            | KAG2368229.1   | 240664  | 351       | 555.3     | cd12188   | 5-358    | 0.00E+00 |
|                         | Suillaceae       | <i>Suillus decipiens</i>           | KAG2077096.1   | 240664  | 351       | 554.53    | cd12188   | 6-358    | 0.00E+00 |
|                         | Suillaceae       | <i>Suillus clintonianus</i>        | XP_041206159.1 | 240664  | 351       | 556.08    | cd12188   | 6-358    | 0.00E+00 |
|                         | Suillaceae       | <i>Suillus ampliporus</i>          | KAG0709064.1   | 240664  | 351       | 559.16    | cd12188   | 6-358    | 0.00E+00 |

|                          |                 |                                  |                |        |     |        |         |       |          |
|--------------------------|-----------------|----------------------------------|----------------|--------|-----|--------|---------|-------|----------|
|                          | Rhizopogonaceae | <i>Rhizopogon vinicolor</i>      | OAX44812.1     | 240664 | 351 | 526.03 | cd12188 | 6-358 | 0.00E+00 |
|                          | Suillaceae      | <i>Suillus paluster</i>          | XP_041183794.1 | 240664 | 351 | 551.45 | cd12188 | 6-353 | 0.00E+00 |
|                          | Suillaceae      | <i>Suillus brevipes</i>          | KAG2754539.1   | 240664 | 351 | 561.47 | cd12188 | 6-358 | 0.00E+00 |
|                          | Suillaceae      | <i>Suillus occidentalis</i>      | KAG1773126.1   | 240664 | 351 | 552    | cd12188 | 6-358 | 0.00E+00 |
|                          | Suillaceae      | <i>Suillus placidus</i>          | KAG1783737.1   | 240664 | 351 | 551.07 | cd12188 | 6-361 | 0.00E+00 |
|                          | Suillaceae      | <i>Suillus americanus</i>        | KAG2044207.1   | 240664 | 351 | 554.92 | cd12188 | 6-358 | 0.00E+00 |
|                          | Suillaceae      | <i>Suillus subalutaceus</i>      | XP_041248104.1 | 240664 | 351 | 556.85 | cd12188 | 6-358 | 0.00E+00 |
|                          | Suillaceae      | <i>Suillus subaureus</i>         | XP_041199417.1 | 240664 | 351 | 557.23 | cd12188 | 6-358 | 0.00E+00 |
|                          | Suillaceae      | <i>Suillus cothurnatus</i>       | KAG2149799.1   | 240664 | 351 | 560.7  | cd12188 | 6-358 | 0.00E+00 |
|                          | Suillaceae      | <i>Suillus lakei</i>             | KAG1757371.1   | 240664 | 351 | 530.27 | cd12188 | 6-351 | 0.00E+00 |
|                          | Suillaceae      | <i>Suillus bovinus</i>           | XP_041307276.1 | 240664 | 351 | 559.54 | cd12188 | 5-358 | 0.00E+00 |
|                          | Suillaceae      | <i>Suillus variegatus</i>        | KAG1834565.1   | 240664 | 351 | 562.62 | cd12188 | 5-358 | 0.00E+00 |
|                          | Suillaceae      | <i>Suillus tomentosus</i>        | KAG1866257.1   | 240664 | 351 | 557.23 | cd12188 | 6-358 | 0.00E+00 |
|                          | Suillaceae      | <i>Suillus hirtellus</i>         | KAG2062054.1   | 240664 | 351 | 561.85 | cd12188 | 5-358 | 0.00E+00 |
|                          | Suillaceae      | <i>Suillus discolor</i>          | XP_041298324.1 | 240664 | 351 | 561.08 | cd12188 | 5-358 | 0.00E+00 |
|                          | Suillaceae      | <i>Suillus plorans</i>           | XP_041164869.1 | 240664 | 351 | 559.16 | cd12188 | 6-358 | 0.00E+00 |
|                          | Suillaceae      | <i>Suillus fuscotomentosus</i>   | XP_041220431.1 | 240664 | 351 | 564.16 | cd12188 | 5-358 | 0.00E+00 |
|                          | Boletaceae      | <i>Xerocomus badius</i>          | KAF8551619.1   | 240664 | 351 | 548.37 | cd12188 | 4-359 | 0.00E+00 |
|                          | Boletaceae      | <i>Boletus reticuloceph</i>      | KAG6376707.1   | 240664 | 351 | 539.9  | cd12188 | 4-359 | 0.00E+00 |
|                          | Gyrodontaceae   | <i>Gyrodon lividus</i>           | KAF9229508.1   | 240664 | 351 | 524.1  | cd12188 | 7-362 | 0.00E+00 |
|                          | Paxillaceae     | <i>Paxillus involutus</i>        | KIJ21575.1     | 240664 | 351 | 537.97 | cd12188 | 4-359 | 0.00E+00 |
|                          | Paxillaceae     | <i>Paxillus ammoniavirescens</i> | KAF8845261.1   | 240664 | 351 | 537.2  | cd12188 | 4-359 | 0.00E+00 |
| Polyporales <sup>a</sup> | Polyporaceae    | <i>Polyporus brumalis</i>        | RDX56030.1     | 240664 | 351 | 582.27 | cd12188 | 6-372 | 0.00E+00 |
|                          | Polyporaceae    | <i>Polyporus arcularius</i>      | TFK94363.1     | 240664 | 351 | 578.8  | cd12188 | 6-372 | 0.00E+00 |
|                          | Polyporaceae    | <i>Lentinus tigrinus</i>         | RPD63103.1     | 240664 | 351 | 577.26 | cd12188 | 6-360 | 0.00E+00 |

|                                  |                     |                                 |                |        |     |        |         |        |          |
|----------------------------------|---------------------|---------------------------------|----------------|--------|-----|--------|---------|--------|----------|
|                                  | Polyporaceae        | <i>Dichomitus squalens</i>      | TBU64909.1     | 240664 | 351 | 571.87 | cd12188 | 6-360  | 0.00E+00 |
|                                  | Fomitopsidaceae     | <i>Daedalea quercina</i>        | KZT74771.1     | 240664 | 351 | 558.77 | cd12188 | 6-360  | 0.00E+00 |
|                                  | Polyporaceae        | <i>Trametes pubescens</i>       | OJT12634.1     | 240664 | 351 | 572.64 | cd12188 | 6-367  | 0.00E+00 |
|                                  | Polyporaceae        | <i>Trametes versicolor</i>      | XP_008032403.1 | 240664 | 351 | 570.71 | cd12188 | 6-367  | 0.00E+00 |
|                                  | Polyporaceae        | <i>Trametes coccinea</i>        | OSD06069.1     | 240664 | 351 | 592.67 | cd12188 | 6-360  | 0.00E+00 |
| Tremellales <sup>b</sup>         | Cryptococcaceae     | <i>Cryptococcus wingfieldii</i> | XP_019027901.1 | 240664 | 351 | 514.47 | cd12188 | 21-380 | 0.00E+00 |
|                                  | Cryptococcaceae     | <i>Cryptococcus neoformans</i>  | OWZ45351.1     | 240664 | 351 | 527.96 | cd12188 | 21-381 | 0.00E+00 |
|                                  | Cryptococcaceae     | <i>Cryptococcus gattii</i>      | KIR47068.1     | 240664 | 351 | 529.5  | cd12188 | 21-381 | 0.00E+00 |
|                                  | Trimorphomycetaceae | <i>Saitozyma podzolica</i>      | RSH89270.1     | 240664 | 351 | 513.7  | cd12188 | 21-382 | 0.00E+00 |
|                                  | Trimorphomycetaceae | <i>Saitozyma</i> sp.            | GFZ45358.1     | 240664 | 351 | 521.02 | cd12188 | 21-382 | 0.00E+00 |
|                                  | Naemateliaceae      | <i>Naematelia encephala</i>     | ORY31427.1     | 240664 | 351 | 518.71 | cd12188 | 30-391 | 0.00E+00 |
|                                  | Cryptococcaceae     | <i>Kwoniella mangroviensis</i>  | XP_019000803.1 | 240664 | 351 | 520.25 | cd12188 | 21-381 | 0.00E+00 |
|                                  | Cryptococcaceae     | <i>Kwoniella bestiolae</i>      | XP_019045793.1 | 240664 | 351 | 519.48 | cd12188 | 21-381 | 0.00E+00 |
|                                  | Cryptococcaceae     | <i>Kwoniella dejecticola</i>    | XP_018262506.1 | 240664 | 351 | 506    | cd12188 | 21-381 | 0.00E+00 |
|                                  | Cryptococcaceae     | <i>Kwoniella heveanensis</i>    | OCF30597.1     | 240664 | 351 | 516.4  | cd12188 | 21-381 | 0.00E+00 |
| Trichosporonales <sup>b</sup>    | Trichosporonaceae   | <i>Apiotrichum porosum</i>      | XP_028474516.1 | 240664 | 351 | 532.58 | cd12188 | 7-369  | 0.00E+00 |
|                                  | Trichosporonaceae   | <i>Trichosporon asahii</i>      | XP_014180072.1 | 240664 | 351 | 532.58 | cd12188 | 8-368  | 0.00E+00 |
| Cystofilobasidiales <sup>b</sup> | Mrakiaceae          | <i>Phaffia rhodozyma</i>        | CDZ96774.1     | 240664 | 351 | 516.4  | cd12188 | 7-364  | 0.00E+00 |

Note: “a”: Agaricomycetes, “b”: Tremellomycetes. Function description: Saccharopine dehydrogenase (SDH) catalyzes the cleavage of saccharopine to  $\alpha$ -ketoglutarate and L-lysine, the final step in the lysine biosynthesis pathway. The SDH of all strains belong to the PLN02819 superfamily (Accession: cl33572).



**Table S4.** The sequences used to construct the phylogenetic tree of species in this study.

| Order                   | Family           | Species                            | Strains       | LSU        | SSU        | RPB1       | RPB2       | ITS(5.8S)  | EF1- $\alpha$ |
|-------------------------|------------------|------------------------------------|---------------|------------|------------|------------|------------|------------|---------------|
| Agaricales <sup>a</sup> | Amanitaceae      | <i>Amanita rubescens</i>           | HKAS92040     | MH486816.1 | —          | —          | MH486227.1 | MH508559.1 | MH509043.1    |
|                         | Amanitaceae      | <i>Macrolepiota fuliginosa</i>     | TO AFM11      | —          | —          | —          | —          | HM246502.1 | —             |
|                         | Amanitaceae      | <i>Leucoagaricus</i> sp.           | 177275        | MT669247.1 | —          | —          | —          | MT669115.1 | —             |
|                         | Amanitaceae      | <i>Panaeolus papilionaceus</i>     | DNA1940       | KF830082.1 | KF830073.1 | —          | KF830065.1 | KF830093.1 | —             |
|                         | Crassisporiaceae | <i>Crassisporium funariophilum</i> | 366861        | —          | —          | —          | —          | MT703796.1 | —             |
|                         | Cortinariaceae   | <i>Cortinarius glaucopus</i>       | TUB 011414    | —          | —          | EU088237.1 | —          | AY174787.1 | —             |
|                         | Hymenogastraceae | <i>Flammula alnicola</i>           | AFTOL-ID 1501 | DQ457666.1 | DQ113916.1 | DQ447900.1 | DQ472714.1 | —          | —             |
|                         | e                | <i>Gymnopilus junonius</i>         | CBS 420.50    | MH868214.1 | —          | —          | —          | MH856698.1 | —             |
|                         | Nidulariaceae    | <i>Crucibulum laeve</i>            | TUB 011564    | DQ071771.1 | —          | DQ067950.1 | —          | DQ071701.2 | —             |
|                         | Lyophyllaceae    | <i>Hypsizygus marmoreus</i>        | 3144          | —          | —          | —          | —          | FJ609282.1 | —             |
|                         | Lyophyllaceae    | <i>Lyophyllum atratum</i>          | CBS709.87     | —          | —          | EF421033.1 | EF420999.1 | —          | EF421065.1    |
|                         | Marasmiaceae     | <i>Marasmius fiardii</i>           | —             | —          | —          | —          | —          | —          | —             |
|                         | Marasmiaceae     | <i>Moniliophthora roreri</i>       | C21           | AY916744.1 | AY916745.1 | AY916747.1 | —          | AY916746.1 | AY916748.1    |
|                         | Mycenaceae       | <i>Mycena indigotica</i>           | WEI 16-475    | MF993024.1 | —          | —          | —          | MF993026.1 | —             |
|                         | Mycenaceae       | <i>Mycena chlorophos</i>           | ACL271        | —          | —          | —          | KJ406371.1 | KJ206986.1 | —             |
|                         | Mycenaceae       | <i>Mycena galopus</i>              | CBS 182.46    | MH867683.1 | —          | —          | —          | MH856158.1 | —             |
|                         | Nidulariaceae    | <i>Cyathus striatus</i>            | TUB 011565    | DQ071742.2 | —          | DQ068021.1 | —          | —          | —             |
|                         | Omphalotaceae    | <i>Gymnopus androsaceus</i>        | CBS 241.53    | MH868715.1 | —          | —          | —          | MH857176.1 | —             |
|                         | Omphalotaceae    | <i>Lentinula edodes</i>            | TMI1941       | AF261557   | AF082686   | —          | —          | AY636053   | —             |
|                         | Physalacriaceae  | <i>Armillaria gallica</i>          | HKAS85517     | —          | —          | —          | —          | KT822312.1 | KT822409.1    |
|                         | Physalacriaceae  | <i>Armillaria solidipes</i>        | W1-9          | JF895919.1 | —          | —          | JF895886.1 | —          | JF895853.1    |

|                        |                              |                           |            |            |            |            |            |            |
|------------------------|------------------------------|---------------------------|------------|------------|------------|------------|------------|------------|
| Physalacriaceae        | <i>Cylindrobasidium</i>      |                           |            |            |            |            |            |            |
|                        | <i>torrendii</i>             | CBS 125844                | MH875265.1 | —          | —          | —          | MH863803.1 | —          |
| Physalacriaceae        | <i>Flammulina velutipes</i>  | AFTOL_ID_558              | AY639883   | AY665781   | AY858966   | AY786055   | AY854073   | —          |
| Physalacriaceae        | <i>Guyanagaster</i>          |                           |            |            |            |            |            |            |
|                        | <i>necrorhizus</i>           | G31.4                     | KU254227.1 | —          | —          | —          | KU170950.1 | KU289110.1 |
| Psathyrellaceae        | <i>Coprinellus angulatus</i> | CBS 175.51                | MH868315.1 | —          | —          | —          | MH856799.1 | —          |
| Psathyrellaceae        | <i>Coprinellus micaceus</i>  | SZMC-NL-4253              | —          | JN939889.1 | —          | —          | JN943116.1 | —          |
| Psathyrellaceae        | <i>Coprinopsis cinerea</i>   | CBS 126970                | MH875802.1 | —          | —          | —          | MH864360.1 | —          |
| Psathyrellaceae        | <i>Coprinopsis</i>           |                           |            |            |            |            |            |            |
|                        | <i>marcescibilis</i>         | CBS 302.47                | MH867797.1 | —          | —          | —          | MH856262.1 | —          |
| Pluteaceae             | <i>Pluteus cervinus</i>      | FO 46619                  | DQ071729.2 | —          | DQ067955.1 | —          | —          | —          |
| Pleurotaceae           | <i>Pleurotus ostreatus</i>   | 6689                      | —          | —          | —          | MK810572.1 | AY450345.1 | MK810672.1 |
| Pleurotaceae           | <i>Pleurotus pulmonarius</i> | ZRL20151671               | KY418877.1 | KY418943.1 | —          | KY419022.1 | LT716061.1 | KY419073.1 |
| Pterulaceae            | <i>Pterula gracilis</i>      | IO.14.142 (S)             | MT232310.1 | MT232498.1 | —          | —          | MT232356.1 | MT242358.1 |
| Strophariaceae         | <i>Agrocybe pediades</i>     | AFTOL-ID 1493             | DQ110872.1 | DQ113915.1 | —          | —          | DQ484057.1 | —          |
| Strophariaceae         | <i>Pholiota conissans</i>    | CBS 175.47                | MH867735.1 | —          | —          | —          | MH856205.1 | —          |
| Strophariaceae         | <i>Pholiota molesta</i>      | MTS4953a                  | —          | —          | —          | MG923696.1 | MG735309.1 | MN311971.1 |
| Tricholomataceae       | <i>Infundibulicybe gibba</i> | AFTOL-ID 1508             | DQ457682.1 | DQ115780.1 | DQ447913.1 | DQ472727.2 | DQ490635.1 | —          |
| Tricholomataceae       | <i>Laccaria bicolor</i>      | KA13-0253                 | MG519570.1 | —          | —          | MG551599.1 | MG519524.1 | MG551636.1 |
| Tricholomataceae       | <i>Lepista nuda</i>          | 11CA041                   | KJ021705.1 | KJ021692.1 | —          | KJ136110.1 | —          | MG702630.1 |
| Tricholomataceae       | <i>Tricholoma matsutake</i>  | Tm029                     | —          | —          | —          | —          | AB559004.1 | AB699735.1 |
| Boletales <sup>a</sup> | Paxillaceae                  | <i>Gyrodon lividus</i>    | REG G11    | —          | DQ534681.1 | —          | GU187786.1 | DQ534568.1 |
|                        | Paxillaceae                  | <i>Paxillus involutus</i> | Bel10.4    | —          | —          | —          | JQ436854.1 | KF261366.1 |
|                        | Paxillaceae                  | <i>Paxillus</i>           |            |            |            |            |            |            |
|                        |                              | <i>ammoniaevirescens</i>  | Cas12.1    | —          | —          | —          | KF261380.1 | KF261518.1 |
|                        | Boletaceae                   | <i>Xerocomus badius</i>   | MB 03-098a | KF030355   | —          | KF030393   | —          | KF030423   |

|                 |                                |                             |            |            |            |            |            |            |
|-----------------|--------------------------------|-----------------------------|------------|------------|------------|------------|------------|------------|
|                 | <i>Boletus reticulocephus</i>  | HKAS62910                   | JN563843.1 | —          | JN563862.1 | —          | JN563884.1 | —          |
| Suillaceae      | <i>Rhizopogon vinicolor</i>    | JMT20787                    | —          | —          | —          | —          | AF062941.1 | —          |
| Suillaceae      | <i>Suillus brevipes</i>        | F1187371                    | KU721323.1 | —          | KU852270.1 | KU852302.1 | KU721224.1 | KU721760.1 |
| Suillaceae      | <i>Suillus spraguei</i>        | TDB-638                     | KU721505.1 | —          | KU852201.1 | KU852358.1 | KU721527.1 | KU721721.1 |
| Suillaceae      | <i>Suillus decipiens</i>       | BKr1029002                  | KU721521.1 | —          | —          | —          | KU721495.1 | KU721709.1 |
| Suillaceae      | <i>Suillus clintonianus</i>    | 07.08.30-19                 | —          | —          | —          | —          | KU059568.1 | —          |
| Suillaceae      | <i>Suillus ampliporus</i>      | ACD0177                     | —          | —          | —          | —          | MZ919172.1 | —          |
| Suillaceae      | <i>Suillus paluster</i>        | HKAS:63134                  | KU721407.1 | —          | KU852251.1 | KU852371.1 | KU721255.1 | KU721586.1 |
| Suillaceae      | <i>Suillus occidentalis</i>    | Mushroom<br>Observer 283944 | —          | —          | —          | —          | MT437070.1 | —          |
| Suillaceae      | <i>Suillus placidus</i>        | TENN:062310                 | KU721389.1 | —          | KU852189.1 | KU852364.1 | KU721274.1 | KU721558.1 |
| Suillaceae      | <i>Suillus americanus</i>      | C0075059F                   | KY489971.1 | —          | KU852261.1 | KU852351.1 | KU663184.1 | KU663205.1 |
| Suillaceae      | <i>Suillus subalutaceus</i>    | MN175                       | —          | —          | —          | —          | KX230630.1 | —          |
| Suillaceae      | <i>Suillus subaureus</i>       | F1189253                    | KU721365.1 | —          | KU852203.1 | KU852356.1 | KU721171.1 | KU721699.1 |
| Suillaceae      | <i>Suillus cothurnatus</i>     | MA-Fungi 47683              | —          | —          | —          | —          | AJ419218.1 | —          |
| Suillaceae      | <i>Suillus lakei</i>           | RZ120208                    | KU721361.1 | —          | KU852242.1 | KU852374.1 | KU721189.1 | KU721589.1 |
| Suillaceae      | <i>Suillus bovinus</i>         | KM164971                    | KU721292.1 | —          | KU852269.1 | KU852336.1 | KU721203.1 | KU721733.1 |
| Suillaceae      | <i>Suillus variegatus</i>      | DG86                        | —          | —          | —          | —          | JQ888210.1 | —          |
| Suillaceae      | <i>Suillus tomentosus</i>      | F1186917                    | KU721301.1 | —          | KU852205.1 | KU852345.1 | KU721157.1 | KU721748.1 |
| Suillaceae      | <i>Suillus hirtellus</i>       | ADW:0118                    | KX171000.1 | —          | —          | KX171007.1 | KU721152.1 | KX171004.1 |
| Suillaceae      | <i>Suillus discolor</i>        | MICH 341813                 | —          | —          | —          | —          | KX213790.1 | —          |
| Suillaceae      | <i>Suillus plorans</i>         | HKAS:63225                  | KU721313.1 | —          | —          | —          | KU721165.1 | KU721738.1 |
| Suillaceae      | <i>Suillus fuscotomentosus</i> | BW6                         | KU721309.1 | —          | KU852283.1 | KU852340.1 | KU721158.1 | KU721747.1 |
| Gloeophyllaceae | <i>Neolentinus lepideus</i>    | DAOM:208668                 | HM536077.1 | HM536078.1 | —          | HM536121.1 | —          | HM536122.1 |

|                              |                  |                                 |                        |            |            |            |            |            |            |
|------------------------------|------------------|---------------------------------|------------------------|------------|------------|------------|------------|------------|------------|
| Gloeophyllales <sup>a</sup>  | Gloeophyllaceae  | <i>Heliocybe sulcata</i>        | IBUG 9930              | HM536069   | HM536070   | —          | HM536114   | HM536095   | HM536115   |
|                              | Gloeophyllaceae  | <i>Gloeophyllum trabeum</i>     | 1320                   | HM536067.1 | HM536068.1 | —          | HM536112.1 | HM536094.1 | HM536113.1 |
| Polyporales <sup>a</sup>     | Laetiporaceae    | <i>Laetiporus sulphureus</i>    | Dai 12154              | KF951302   | KR605924   | —          | KR610841   | KF951295   | KR610752   |
|                              | Fomitopsidaceae  | <i>Daedalea quercina</i>        | Dai 12659              | KP171230.1 | KR605887.1 | —          | KR610810.1 | KP171208.1 | KR610719.1 |
|                              | Polyporaceae     | <i>Lentinus tigrinus</i>        | DSH92D787              | —          | —          | KP325689.1 | —          | KP283488.1 | —          |
|                              | Polyporaceae     | <i>Polyporus arcularius</i>     | Cui 6450               | KX900098.1 | KX905089.1 | KX900376.1 | KX900299.1 | KX899967.1 | KX900326.1 |
|                              | Polyporaceae     | <i>Polyporus brumalis</i>       | Cui 2769               | KX851650.1 | KX851726.1 | KX851748.1 | KX851759.1 | KX851595.1 | KX851775.1 |
|                              | Polyporaceae     | <i>Trametes coccinea</i>        | Cui 7096               | —          | KX880718.1 | KX880822.1 | KX880857.1 | —          | KX880892.1 |
|                              | Polyporaceae     | <i>Trametes versicolor</i>      | ZRL20151477            | KY418903   | KY418958   | KY418984   | KY419041   | LT716079   | KY419091   |
|                              | Polyporaceae     | <i>Trametes pubescens</i>       | HHB13585sp             | —          | —          | KF573164.1 | KF573117.1 | JN164947.1 | KF573060.1 |
|                              | Polyporaceae     | <i>Ganoderma boninense</i>      | WD 2085                | —          | —          | KJ143945.1 | KJ143965.1 | KJ143906.1 | KJ143925.1 |
|                              | Polyporaceae     | <i>Dichomitus squalens</i>      | Cui 9639               | —          | KX838404.1 | KX838471.1 | KX838478.1 | —          | KX838436.1 |
|                              | Stereaceae       | <i>Stereum hirsutum</i>         | AFTOL-ID 492           | —          | —          | AY864885.1 | AY218520.2 | AY854063.1 | AY885159.1 |
| Russulales <sup>a</sup>      | Hericiaceae      | <i>Dentipellis</i> sp.          | Dai 18768              | MH571700.1 | —          | —          | —          | MH571703.1 | —          |
|                              | Russulaceae      | <i>Russula ochroleuca</i>       | FH12211                | KT933857.1 | —          | KT957368.1 | KT933928.1 | KT933996.1 | —          |
|                              | Russulaceae      | <i>Russula emetica</i>          | 635/JMT39.08092<br>228 | KU237578.1 | KU237426.1 | KU237721.1 | KU237864.1 | —          | —          |
|                              | Russulaceae      | <i>Lactarius quietus</i>        | KW138                  | —          | —          | —          | KR025739.1 | KT165231.1 | —          |
|                              | Peniophoraceae   | <i>Peniophora</i> sp.           | HUT104                 | —          | —          | —          | —          | KU377265.1 | —          |
| Hymenochaetales <sup>a</sup> | Rickenellaceae   | <i>Rickenella mellea</i>        | CBS 581.87             | MH873796.1 | —          | —          | —          | MH862107.1 | —          |
|                              | Hymenochaetaceae | <i>Pyrrhoderma noxium</i>       | UO 7                   | MG734465.1 | —          | —          | MH398393.1 | MG645087.1 | MH398488.1 |
|                              | Hymenochaetaceae | <i>Fomitiporia mediterranea</i> | AFTOL-ID 688           | AY684157.1 | AY662664.1 | AY864870.1 | AY803748.1 | AY854080.1 | AY885149.1 |
|                              | Hymenochaetaceae | <i>Sanghuangporus baumii</i>    | Dai 17133              | MH101002.1 | —          | MH101029.1 | MH101237.1 | —          | MH101118.1 |

|                             |                    |                                  |              |            |            |            |            |             |            |
|-----------------------------|--------------------|----------------------------------|--------------|------------|------------|------------|------------|-------------|------------|
|                             | Schizoporaceae     | <i>Schizopora paradoxa</i>       | CBS 319.53   | MH868758.1 | —          | —          | —          | MH857220.1  | —          |
| Gomphales <sup>a</sup>      | Gomphaceae         | <i>Ramaria rubella</i>           | AFTOL-ID 724 | AY645057.1 | AY707095.1 | AY864866.1 | AY786064.1 | AY854078.1  | AY883435.1 |
| Auriculariales <sup>a</sup> | Auriculariaceae    | <i>Auricularia subglabra</i>     | Dai 17403    | MH213419.1 | —          | —          | MH213448.1 | MH213382.1  | —          |
|                             |                    | <i>Exidia glandulosa</i>         | Dai 18024    | MH213426.1 | —          | —          | MH213457.1 | MH213394.1  | —          |
| Cantharellales <sup>a</sup> | Hydnaceae          | <i>Clavulina</i> sp.             | MB03-034     | AY745694.1 | AY757265.1 | —          | DQ366286.1 | DQ202266.1  | DQ028589.1 |
| Tremellales <sup>b</sup>    | Trimorphomycetaeae | <i>Saitozyma podzolica</i>       | CBS_6819     | —          | —          | —          | —          | AF444321.1  | —          |
|                             | Trimorphomycetaeae | <i>Saitozyma pseudoflava</i>     | XZ200A1      | —          | —          | —          | —          | MK0502884.1 | —          |
|                             | Trimorphomycetaeae | <i>Saitozyma</i> sp.             | XZ200A1      | —          | —          | MK849251.1 | MK849387.1 | —           | MK849114.1 |
|                             | Naemateliaceae     | <i>Naematelia encephala</i>      | CBS6968      | —          | —          | —          | —          | AF410474.1  | —          |
|                             | Naemateliaceae     | <i>Tremella encephala</i>        | CBS6968      | —          | KF036698.1 | KF036525.1 | KF036941.1 | —           | KF037203.1 |
|                             | Cryptococcaceae    | <i>Kwoniella dejecticola</i>     | CBS:10117    | KY108197.1 | —          | —          | —          | KY103929.1  | —          |
|                             | Cryptococcaceae    | <i>Kwoniella bestiolae</i>       | CBS 10118    | KY108196.1 | —          | —          | —          | KY103928.1  | —          |
|                             | Cryptococcaceae    | <i>Kwoniella mangrovensis</i>    | CBS 8507     | FJ534912.1 | FJ534897.1 | FJ534928.1 | FJ534943.1 | FJ534882.1  | FJ534866.1 |
|                             | Cryptococcaceae    | <i>Kwoniella heveanensis</i>     | CBS 569      | FJ534905.1 | FJ534891.1 | FJ534921.1 | —          | FJ534875.1  | FJ534860.1 |
|                             | Cryptococcaceae    | <i>Cryptococcus gattii</i>       | CBS:10514    | KY107017.1 | —          | —          | —          | KY102661.1  | —          |
|                             | Cryptococcaceae    | <i>Filobasidiella neoformans</i> | CBS 132      | AF075484.1 | —          | —          | —          | —           | —          |
|                             | Cryptococcaceae    | <i>Cryptococcus neoformans</i>   | CBS 132      | —          | HQ596559   | KF036472.1 | KF036886   | AF444326.1  | KF037151.1 |
|                             | Cryptococcaceae    | <i>Tsuchiyaea wingfieldii</i>    | CBS7118      | —          | —          | KF036577.1 | KF036994.1 | EF211246.1  | KF037250.1 |

|                               |                                  |                                        |                          |            |            |            |            |            |            |
|-------------------------------|----------------------------------|----------------------------------------|--------------------------|------------|------------|------------|------------|------------|------------|
| Trichosporonales <sup>b</sup> | Trichosporonaceae                | <i>Cutaneotrichosporon oleaginosum</i> | R97187                   | —          | —          | —          | —          | MK268120.1 | —          |
|                               | Trichosporonaceae                | <i>Apiotrichum porosum</i>             | AMF086                   | MN307946.1 | —          | —          | —          | MN309722.1 | —          |
|                               | Trichosporonaceae                | <i>Trichosporon asahii</i>             | CBS 2479                 | —          | —          | KF036539.1 | KF036955.1 | —          | KF037216.1 |
|                               | Trichosporonaceae                | <i>Cryptococcus podzolicus</i>         | CBS6819                  | AF075481.1 | AB032645.1 | KF036396.1 | KF036810.1 | —          | KF037081.1 |
|                               | Cystofilobasidiales <sup>b</sup> | Mrakiaceae                             | <i>Phaffia rhodozyma</i> | CBS5905    | —          | KF036689.1 | —          | KF036933.1 | DQ904246.1 |
|                               |                                  |                                        |                          |            |            |            |            | DQ904246.1 | KF037195.1 |

**Note:** “a”: Agaricomycetes, “b”: Tremellomycetes. “-”: Not sequence found in NCBI. LSU: Large subunit, SSU: Small subunit, RPB1: RNA Polymerase I, RPB2: RNA Polymerase II, ITS (5.8S): Internal transcribed spacer in 5.8S rRNA, EF1- $\alpha$ : Translation elongation factor 1-alpha.

**Table S5.** Characteristics of the predicted secondary structures of HCS, AAR and SDH in Agaricomycetes.

| Strains                            | Alpha helix (%) |            |            | Extended strand (%) |            |           | Beta turn (%) |           |          | Random coil (%) |            |            |
|------------------------------------|-----------------|------------|------------|---------------------|------------|-----------|---------------|-----------|----------|-----------------|------------|------------|
|                                    | HCS             | AAR        | SDH        | HCS                 | AAR        | SDH       | HCS           | AAR       | SDH      | HCS             | AAR        | SDH        |
| <i>Armillaria gallica</i>          | 44.49(210)      | 36.56(521) | 31.42(115) | 12.50(59)           | 15.23(217) | 19.67(72) | 6.14(29)      | 4.70 (67) | 4.64(17) | 36.86(174)      | 43.51(620) | 44.26(162) |
| <i>Armillaria solidipes</i>        | 42.58(201)      | 37.51(533) | 31.97(117) | 12.92(61)           | 14.78(210) | 19.95(73) | 5.7 (27)      | 4.50(64)  | 4.10(15) | 38.77(183)      | 43.21(614) | 43.99(161) |
| <i>Guyanagaster necrorhizus</i>    | —               | —          | 32.07(118) | —                   | —          | 19.84(73) | —             | —         | 4.08(15) | —               | —          | 44.02(162) |
| <i>Cyathus striatus</i>            | —               | 37.73(509) | —          | —                   | 14.83(200) | —         | —             | 5.19(70)  | —        | —               | 42.25(570) | —          |
| <i>Coprinellus angulatus</i>       | 43.72(209)      | 35.51(435) | —          | 11.72(56)           | 15.76(193) | —         | 5.23(25)      | 5.88 (72) | —        | 39.33(188)      | 42.86(525) | —          |
| <i>Coprinellus micaceus</i>        | 43.70(208)      | 34.67(607) | —          | 10.92(52)           | 16.16(283) | —         | 5.67(27)      | 5.43(95)  | —        | 39.71(189)      | 43.75(766) | —          |
| <i>Coprinopsis cinerea</i>         | 41.63(204)      | —          | —          | 11.63(57)           | —          | —         | 5.10(25)      | —         | —        | 41.63(204)      | —          | —          |
| <i>Coprinopsis marcescibilis</i>   | 44.12(210)      | —          | 32.52(120) | 12.39(59)           | —          | 19.78(73) | 5.46(26)      | —         | 5.15(19) | 38.03(181)      | —          | 42.55(157) |
| <i>Cortinarius glaucopus</i>       | 43.71(205)      | —          | —          | 12.37(58)           | —          | —         | 5.12(24)      | —         | —        | 38.81(182)      | —          | —          |
| <i>Amanita rubescens</i>           | —               | 37.45(534) | —          | —                   | 14.94(213) | —         | —             | 4.70 (67) | —        | —               | 42.92(612) | —          |
| <i>Infundibulicybe gibba</i>       | —               | 37.15(516) | —          | —                   | 14.61(203) | —         | —             | 5.04 (70) | —        | —               | 43.20(600) | —          |
| <i>Macrolepiota fuliginosa</i>     | —               | 37.02(529) | 31.98(118) | —                   | 14.63(209) | 19.51(72) | —             | 5.04 (72) | 4.61(17) | —               | 43.32(619) | 43.9 (162) |
| <i>Pluteus cervinus</i>            | 43.31(204)      | 37.25(532) | —          | 12.95(61)           | 14.92(213) | —         | 5.73(27)      | 4.90 (70) | —        | 38.00(179)      | 42.93(613) | —          |
| <i>Crucibulum laeve</i>            | —               | 36.37(507) | 32.88(121) | —                   | 14.85(207) | 18.21(67) | —             | 4.81 (67) | 4.62(17) | —               | 43.97(613) | 44.29(163) |
| <i>Crassisporium funariophilum</i> | —               | 36.97(528) | 32.34(119) | —                   | 14.85(212) | 19.02(70) | —             | 4.90 (70) | 4.35(16) | —               | 43.28(618) | 44.29(163) |
| <i>Agrocybe pediades</i>           | —               | 37.01(524) | —          | —                   | 15.25(216) | —         | —             | 5.08 (72) | —        | —               | 42.66(604) | —          |
| <i>Flammula alnicola</i>           | —               | 37.53(537) | —          | —                   | 14.68(210) | —         | —             | 5.03 (72) | —        | —               | 42.77(612) | —          |
| <i>Flammulina velutipes</i>        | 43.75(203)      | —          | 30.98(114) | 13.15(61)           | —          | 19.02(70) | 6.90(32)      | —         | 3.53(13) | 36.21(168)      | —          | 46.47(171) |
| <i>Cylindrobasidium torrendii</i>  | 41.47(192)      | —          | —          | 12.96(60)           | —          | —         | 6.05(28)      | —         | —        | 39.52(183)      | —          | —          |
| <i>Pterula gracilis</i>            | 43.23(198)      | —          | —          | 12.88(59)           | —          | —         | 5.90(27)      | —         | —        | 37.99(174)      | —          | —          |
| <i>Gymnopilus junonius</i>         | 41.04(197)      | —          | 28.78(116) | 13.75(66)           | —          | 18.36(74) | 5.83(28)      | —         | 4.22(17) | 39.38(189)      | —          | 48.64(196) |
| <i>Gymnopus androsaceus</i>        | 42.92(200)      | —          | —          | 12.23(57)           | —          | —         | 5.79(27)      | —         | —        | 39.06(182)      | —          | —          |
| <i>Pholiota conissans</i>          | —               | 36.83(526) | —          | —                   | 14.50(207) | —         | —             | 4.69 (67) | —        | —               | 43.98(628) | —          |

|                                |            |            |            |           |            |           |          |           |          |            |            |            |
|--------------------------------|------------|------------|------------|-----------|------------|-----------|----------|-----------|----------|------------|------------|------------|
| <i>Pholiota molesta</i>        | 42.47(203) | 36.49(451) | —          | 11.51(55) | 15.86(196) | —         | 5.65(27) | 4.45 (55) | —        | 40.38(193) | 43.20(534) | —          |
| <i>Panaeolus papilionaceus</i> | —          | 37.64(539) | 31.79(117) | —         | 14.66(210) | 19.02(70) | —        | 4.75 (68) | 3.53(13) | —          | 42.95(615) | 45.65(168) |
| <i>Laccaria bicolor</i>        | —          | 38.66(549) | —          | —         | 14.44(205) | —         | —        | 4.30 (61) | —        | —          | 42.61(605) | —          |
| <i>Lentinula edodes</i>        | 45.85(210) | —          | —          | 13.10(60) | —          | —         | 6.33(29) | —         | —        | 34.72(159) | —          | —          |
| <i>Hypsizygus marmoreus</i>    | —          | 36.73(522) | —          | —         | 14.92(212) | 19.85(78) | —        | 4.79 (68) | 3.82(15) | —          | 43.56(619) | 46.31(182) |
| <i>Lyophyllum atratum</i>      | —          | 37.84(535) | —          | —         | 15.21(215) | —         | —        | 4.88 (69) | —        | —          | 42.08(595) | —          |
| <i>Tricholoma matsutake</i>    | 44.89(211) | 36.66(521) | 32.34(119) | 12.98(61) | 14.85(211) | 19.29(71) | 6.60(31) | 4.86 (69) | 5.16(19) | 35.53(167) | 43.63(620) | 43.21(159) |
| <i>Lepista nuda</i>            | —          | 36.51(517) | 32.88(121) | —         | 15.11(214) | 19.29(71) | —        | 4.80 (68) | 3.80(14) | —          | 43.57(617) | 44.02(162) |
| <i>Pleurotus pulmonarius</i>   | —          | —          | 30.27(112) | —         | —          | 18.92(70) | —        | —         | 3.51(13) | —          | —          | 47.3 (175) |
| <i>Pleurotus ostreatus</i>     | —          | —          | 33.78(125) | —         | —          | 20.27(75) | —        | —         | 3.51(13) | —          | —          | 42.43(157) |
| <i>Mycena indigotica</i>       | —          | 35.08(648) | —          | —         | 16.24(300) | —         | —        | 5.63(104) | —        | —          | 43.04(795) | —          |
| <i>Mycena chlorophos</i>       | —          | 38.14(534) | —          | —         | 15.00(210) | —         | —        | 4.79 (67) | —        | —          | 42.07(589) | —          |
| <i>Mycena galopus</i>          | 44.28(209) | —          | 31.79(117) | 12.08(57) | —          | 19.29(71) | 5.51(26) | —         | 4.89(18) | 38.14(180) | —          | 44.02(162) |
| <i>Leucoagaricus</i> sp.       | —          | —          | 30.83(115) | —         | —          | 18.77(70) | —        | —         | 4.83(18) | —          | —          | 45.58(170) |
| <i>Moniliophthora roreri</i>   | —          | —          | 32.61(120) | —         | —          | 19.84(73) | —        | —         | 3.53(13) | —          | —          | 44.02(162) |
| <i>Marasmius fiardii</i>       | —          | —          | 30.93(116) | —         | —          | 18.67(70) | —        | —         | 4.80(18) | —          | —          | 45.6 (171) |
| <i>Suillus cothurnatus</i>     | —          | —          | 32.25(119) | —         | —          | 19.51(72) | —        | —         | 3.52(13) | —          | —          | 44.72(165) |
| <i>Suillus clintonianus</i>    | —          | —          | 31.79(117) | —         | —          | 19.57(72) | —        | —         | 4.35(16) | —          | —          | 44.29(163) |
| <i>Suillus subalutaceus</i>    | —          | —          | 31.79(117) | —         | —          | 19.02(70) | —        | —         | 4.35(16) | —          | —          | 44.84(165) |
| <i>Suillus ampliporus</i>      | —          | —          | 31.25(115) | —         | —          | 19.29(71) | —        | —         | 4.35(16) | —          | —          | 45.11(166) |
| <i>Suillus fuscotomentosus</i> | —          | —          | 31.52(116) | —         | —          | 19.84(73) | —        | —         | 4.89(18) | —          | —          | 43.75(161) |
| <i>Suillus plorans</i>         | —          | —          | 32.07(118) | —         | —          | 19.84(73) | —        | —         | 4.35(16) | —          | —          | 43.7 (161) |
| <i>Suillus americanus</i>      | —          | —          | 31.25(115) | —         | —          | 19.84(73) | —        | —         | 3.80(14) | —          | —          | 45.11(166) |
| <i>Suillus spraguei</i>        | —          | —          | 31.52(116) | —         | —          | 19.84(73) | —        | —         | 4.62(17) | —          | —          | 44.02(162) |
| <i>Suillus decipiens</i>       | —          | —          | 32.34(119) | —         | —          | 19.29(71) | —        | —         | 4.35(16) | —          | —          | 44.02(162) |
| <i>Suillus bovinus</i>         | —          | —          | 32.61(120) | —         | —          | 18.75(69) | —        | —         | 4.08(15) | —          | —          | 44.57(164) |



|                                  |            |            |            |           |            |           |          |           |          |            |            |            |
|----------------------------------|------------|------------|------------|-----------|------------|-----------|----------|-----------|----------|------------|------------|------------|
| <i>Suillus tomentosus</i>        | —          | —          | 32.88(121) | —         | —          | 19.29(71) | —        | —         | 5.16(19) | —          | —          | 42.66(157) |
| <i>Suillus hirtellus</i>         | —          | —          | 31.79(117) | —         | —          | 19.84(73) | —        | —         | 4.08(15) | —          | —          | 44.29(163) |
| <i>Suillus discolor</i>          | —          | —          | 32.07(118) | —         | —          | 19.57(72) | —        | —         | 4.35(16) | —          | —          | 44.02(162) |
| <i>Suillus subaureus</i>         | —          | —          | 32.07(118) | —         | —          | 19.29(71) | —        | —         | 4.35(16) | —          | —          | 44.29(163) |
| <i>Suillus variegatus</i>        | —          | —          | 34.24(126) | —         | —          | 19.84(73) | —        | —         | 4.08(15) | —          | —          | 41.85(154) |
| <i>Suillus occidentalis</i>      | —          | —          | 30.98(114) | —         | —          | 19.02(70) | —        | —         | 3.80(14) | —          | —          | 46.2 (170) |
| <i>Suillus placidus</i>          | —          | —          | 32.80(122) | —         | —          | 19.09(71) | —        | —         | 4.03(15) | —          | —          | 44.09(164) |
| <i>Suillus paluster</i>          | —          | —          | 32.78(119) | —         | —          | 19.56(71) | —        | —         | 3.03(11) | —          | —          | 44.63(162) |
| <i>Suillus lakei</i>             | —          | —          | 32.41(117) | —         | —          | 17.73(64) | —        | —         | 4.43(16) | —          | —          | 45.43(164) |
| <i>Paxillus involutus</i>        | —          | —          | 30.79(113) | —         | —          | 19.89(73) | —        | —         | 4.09(15) | —          | —          | 45.23(166) |
| <i>Paxillus ammoniavirescens</i> | —          | —          | 31.61(116) | —         | —          | 19.62(72) | —        | —         | 4.36(16) | —          | —          | 44.41(163) |
| <i>Boletus reticuloceps</i>      | —          | —          | 31.25(115) | —         | —          | 20.11(74) | —        | —         | 3.53(13) | —          | —          | 45.11(166) |
| <i>Boletus reticuloceps</i>      | —          | —          | 32.70(120) | —         | —          | 19.35(71) | —        | —         | 4.09(15) | —          | —          | 43.87(161) |
| <i>Rhizopogon vinicolor</i>      | —          | —          | 32.34(119) | —         | —          | 19.57(72) | —        | —         | 4.35(16) | —          | —          | 43.75(161) |
| <i>Gyrodon lividus</i>           | —          | 37.48(539) | 31.62(117) | —         | 14.74(212) | 19.46(72) | —        | 4.87 (70) | 4.59(17) | —          | 42.91(617) | 44.32(164) |
| <i>Xerocomus badius</i>          | —          | 36.86(530) | 33.51(123) | —         | 14.53(209) | 19.35(71) | —        | 4.66 (67) | 4.09(15) | —          | 43.95(632) | 43.05(158) |
| <i>Suillus brevipes</i>          | —          | 37.22(533) | 33.42(123) | —         | 14.53(208) | 19.57(72) | —        | 4.89 (70) | 4.89(18) | —          | 43.37(621) | 42.12(155) |
| <i>Neolentinus lepideus</i>      | —          | 36.65(520) | —          | —         | 15.01(213) | —         | —        | 4.79 (68) | —        | —          | 43.55(618) | —          |
| <i>Heliocybe sulcata</i>         | —          | 37.34(531) | —          | —         | 14.98(213) | —         | —        | 4.78 (68) | —        | —          | 42.90(610) | —          |
| <i>Gloeophyllum trabeum</i>      | —          | 37.12(529) | —          | —         | 14.81(211) | —         | —        | 4.84 (69) | —        | —          | 43.23(616) | —          |
| <i>Laetiporus sulphureus</i>     | —          | 37.00(528) | —          | —         | 14.86(212) | —         | —        | 4.84 (69) | —        | —          | 43.31(618) | —          |
| <i>Daedalea quercina</i>         | —          | 36.99(530) | 33.06(122) | —         | 14.79(212) | 18.70(69) | —        | 4.75 (68) | 4.61(17) | —          | 43.48(623) | 43.63(161) |
| <i>Lentinus tigrinus</i>         | 41.88(201) | 38.31(547) | 31.79(117) | 10.83(52) | 14.50(207) | 19.84(73) | 5.00(24) | 4.41 (63) | 3.53(13) | 42.29(203) | 42.79(611) | 44.84(165) |
| <i>Polyporus arcularius</i>      | 42.29(203) | —          | 31.58(120) | 12.08(58) | —          | 20.26(77) | 6.04(29) | —         | 3.68(14) | 39.58(190) | —          | 44.47(169) |
| <i>Polyporus brumalis</i>        | 42.29(203) | 38.20(547) | 30.53(116) | 12.08(58) | 14.73(211) | 19.21(73) | 6.04(29) | 4.82 (69) | 3.95(15) | 39.58(190) | 42.25(605) | 46.32 176) |
| <i>Trametes coccinea</i>         | 42.54(208) | —          | 32.34(119) | 12.88(63) | —          | 19.29(71) | 6.34(31) | —         | 5.16(19) | 38.24(187) | —          | 43.21(159) |

|                                 |            |             |            |           |            |           |           |           |          |            |            |            |
|---------------------------------|------------|-------------|------------|-----------|------------|-----------|-----------|-----------|----------|------------|------------|------------|
| <i>Trametes versicolor</i>      | 43.44(202) | —           | 32.00(120) | 12.90(60) | —          | 18.93(71) | 6.02(28)  | —         | 2.93(11) | 37.63(175) | —          | 46.13(173) |
| <i>Trametes pubescens</i>       | —          | —           | 30.13(113) | —         | —          | 19.20(72) | —         | —         | 5.33(20) | —          | —          | 45.33(170) |
| <i>Ganoderma boninense</i>      | 44.82(212) | —           | —          | 14.16(67) | —          | —         | 6.77(32)  | —         | —        | 34.25(162) | —          | —          |
| <i>Dichomitus squalens</i>      | 43.33(208) | 36.90(527)  | 30.62(113) | 11.46(55) | 15.13(216) | 18.70(69) | 5.42 (26) | 4.69 (67) | 4.34(16) | 39.79(191) | 43.28(618) | 46.34(171) |
| <i>Stereum hirsutum</i>         | 45.36(210) | 37.68(537)  | —          | 11.45(53) | 14.67(209) | —         | 6.05(28)  | 4.56 (65) | —        | 37.15(172) | 43.09(614) | —          |
| <i>Dentipellis</i> sp.          | —          | 37.38(530)  | —          | —         | 15.16(215) | —         | —         | 5.08 (72) | —        | —          | 42.38(601) | —          |
| <i>Russula ochroleuca</i>       | 44.99(211) | 36.82(524)  | —          | 11.51(54) | 14.90(212) | —         | 5.76(27)  | 4.78 (68) | —        | 37.74(177) | 43.50(619) | —          |
| <i>Russula emetica</i>          | 44.40(206) | 38.12(539)  | —          | 12.07(56) | 14.07(199) | —         | 6.03(28)  | 4.81 (68) | —        | 37.50(174) | 43.00(608) | —          |
| <i>Lactarius quietus</i>        | 45.12(208) | 36.93 (524) | —          | 11.93(55) | 14.73(209) | —         | 5.86(27)  | 4.65 (66) | —        | 37.09(171) | 43.69(620) | —          |
| <i>Peniophora</i> sp.           | 44.59(202) | 37.80(533)  | —          | 12.80(58) | 14.89(210) | —         | 7.06(32)  | 4.89 (69) | —        | 35.54(161) | 42.41(598) | —          |
| <i>Rickenella mellea</i>        | 42.09(205) | —           | —          | 12.73(62) | —          | —         | 4.93(24)  | —         | —        | 40.25(196) | —          | —          |
| <i>Pyrrhoderma noxium</i>       | 45.01(212) | —           | —          | 13.38(63) | —          | —         | 6.16(29)  | —         | —        | 35.46(167) | —          | —          |
| <i>Fomitiporia mediterranea</i> | 44.87(210) | —           | —          | 12.39(58) | —          | —         | 5.98(28)  | —         | —        | 36.75(172) | —          | —          |
| <i>Sanghuangporus baumii</i>    | 47.87(225) | —           | —          | 12.55(59) | —          | —         | 5.74(27)  | —         | —        | 33.83(159) | —          | —          |
| <i>Schizopora paradoxa</i>      | 44.54(216) | —           | —          | 13.20(64) | —          | —         | 5.15(25)  | —         | —        | 37.11(180) | —          | —          |
| <i>Ramaria rubella</i>          | 45.63(214) | —           | —          | 11.73(55) | —          | —         | 5.76(27)  | —         | —        | 36.89(173) | —          | —          |
| <i>Auricularia subglabra</i>    | 42.16(199) | —           | —          | 12.50(59) | —          | —         | 7.42(35)  | —         | —        | 37.92(179) | —          | —          |
| <i>Exidia glandulosa</i>        | 45.14(209) | —           | —          | 12.53(58) | —          | —         | 6.91(32)  | —         | —        | 35.42(164) | —          | —          |
| <i>Cantharellus anzutake</i>    | 44.52(199) | —           | —          | 13.42(60) | —          | —         | 6.49(29)  | —         | —        | 35.57(159) | —          | —          |
| <i>Clavulina</i> sp.            | 44.12(199) | 36.68(522)  | —          | 12.86(58) | 14.90(212) | —         | 5.54(25)  | 5.13 (73) | —        | 37.47(169) | 43.29(616) | —          |
| <i>Cryptococcus neoformans</i>  | —          | —           | 29.62(117) | —         | —          | 17.72(70) | —         | —         | 4.56(18) | —          | —          | 48.1 (190) |
| <i>Cryptococcus wingfieldii</i> | —          | —           | 30.63(121) | —         | —          | 17.97(71) | —         | —         | 3.29(13) | —          | —          | 48.1 (190) |
| <i>Cryptococcus gattii</i>      | —          | —           | 32.15(127) | —         | —          | 18.23(72) | —         | —         | 3.54(14) | —          | —          | 46.08(182) |
| <i>Kwoniella heveanensis</i>    | —          | —           | 30.38(120) | —         | —          | 17.47(69) | —         | —         | 4.30(17) | —          | —          | 47.85(189) |
| <i>Kwoniella mangroviensis</i>  | —          | —           | 30.38(120) | —         | —          | 18.73(74) | —         | —         | 4.81(18) | —          | —          | 46.08(182) |
| <i>Kwoniella bestiulae</i>      | —          | —           | 30.89(122) | —         | —          | 17.47(69) | —         | —         | 4.56(18) | —          | —          | 47.09(186) |

|                                        |            |            |            |           |            |           |          |           |          |            |            |            |
|----------------------------------------|------------|------------|------------|-----------|------------|-----------|----------|-----------|----------|------------|------------|------------|
| <i>Kwoniella dejecticola</i>           | —          | —          | 31.12(122) | —         | —          | 17.09(67) | —        | —         | 4.59(18) | —          | —          | 47.19(185) |
| <i>Apiotrichum porosum</i>             | —          | —          | 31.59(121) | —         | —          | 19.58(75) | —        | —         | 4.96(19) | —          | —          | 43.86(168) |
| <i>Naematelia encephala</i>            | —          | —          | 28.71(116) | —         | —          | 18.56(75) | —        | —         | 5.69(23) | —          | —          | 47.03(190) |
| <i>Trichosporon asahii</i>             | 43.1 (200) | —          | 31.41(120) | 12.72(59) | —          | 19.11(73) | 5.82(27) | —         | 3.93(15) | 38.36(178) | —          | 45.55(174) |
| <i>Cutaneotrichosporon oleaginosum</i> | 43.28(203) | —          | —          | 12.15(57) | —          | —         | 6.82(32) | —         | —        | 37.74(177) | —          | —          |
| <i>Saitozyma</i> sp.                   | 42.62(208) | —          | 31.22(123) | 10.66(52) | —          | 18.53(73) | 5.53(27) | —         | 5.84(23) | 41.19(201) | —          | 44.42(175) |
| <i>Saitozyma podzolica</i>             | —          | —          | 29.19(115) | —         | —          | 17.77(70) | —        | —         | 5.33(21) | —          | —          | 47.72(188) |
| <i>Phaffia rhodozyma</i>               | 39.67(194) | 37.62(541) | 31.00(115) | 13.29(65) | 14.88(214) | 19.41(72) | 7.16(35) | 5.08 (73) | 4.31(16) | 39.88(195) | 42.42(610) | 45.28(168) |

**Table S6.** Sequences used for 3-D structure prediction and conservation analysis of binding sites of HCS, AAR, SDH, respectively.

| HCS                               |                  | AAR                                |                  | SDH                                |                  |
|-----------------------------------|------------------|------------------------------------|------------------|------------------------------------|------------------|
| Strains                           | Accession number | Strains                            | Accession number | Strains                            | Accession number |
| <i>Tricholoma matsutake</i>       | KAF8222095.1     | <i>Armillaria gallica</i>          | PBK98805.1       | <i>Tricholoma matsutake</i>        | KAF8223463.1     |
| <i>Cortinarius glaucopus</i>      | KAF8802540.1     | <i>Armillaria solidipes</i>        | PBK70829.1       | <i>Mycena galopus</i>              | KAF8213335.1     |
| <i>Pluteus cervinus</i>           | TFK72970.1       | <i>Coprinellus micaceus</i>        | TEB29768.1       | <i>Marasmius fiardii</i>           | KAF9270414.1     |
| <i>Pholiota molesta</i>           | KAF8199646.1     | <i>Amanita rubescens</i>           | KAF8345359.1     | <i>Coprinopsis marcescibilis</i>   | TFK30628.1       |
| <i>Pterula gracilis</i>           | TFK98677.1       | <i>Pluteus cervinus</i>            | TFK71908.1       | <i>Moniliophthora roreri</i>       | ESK98395.1       |
| <i>Coprinopsis marcescibilis</i>  | TFK27163.1       | <i>Crucibulum laeve</i>            | TFK37590.1       | <i>Crassisporium funariophilum</i> | KAF8167912.1     |
| <i>Coprinopsis cinerea</i>        | XP_001836353.1   | <i>Crassisporium funariophilum</i> | KAF8157006.1     | <i>Crucibulum laeve</i>            | TFK40972.1       |
| <i>Coprinellus micaceus</i>       | TEB35407.1       | <i>Pholiota molesta</i>            | KAF8180379.1     | <i>Flammulina velutipes</i> *      | QCX08356.1       |
| <i>Mycena galopus</i>             | KAF8207270.1     | <i>Laccaria bicolor</i> *          | XP_001879618.1   | <i>Armillaria gallica</i>          | PBL00798.1       |
| <i>Gymnopus androsaceus</i>       | KAE9408410.1     | <i>Lyophyllum atratum</i>          | KAF8067844.1     | <i>Armillaria solidipes</i>        | PBK77012.1       |
| <i>Flammulina velutipes</i> *     | AGG53996.1       | <i>Tricholoma matsutake</i>        | KAF8223431.1     | <i>Suillus decipiens</i>           | KAG2077096.1     |
| <i>Cylindrobasidium torrendii</i> | KIY65962.1       | <i>Gyrodon lividus</i>             | KAF9226319.1     | <i>Suillus clintonianus</i>        | XP_041206159.1   |
| <i>Armillaria solidipes</i>       | PBK75543.1       | <i>Xerocomus badius</i>            | KAF8553785.1     | <i>Suillus ampliporus</i>          | KAG0709064.1     |
| <i>Armillaria gallica</i>         | PBL03758.1       | <i>Suillus brevipes</i>            | KAF3875411.1     | <i>Suillus paluster</i>            | XP_041183794.1   |
| <i>Trametes coccinea</i>          | OSD06237.1       | <i>Neolentinus lepideus</i>        | KZT28090.1       | <i>Suillus brevipes</i>            | KAG2754539.1     |
| <i>Trametes versicolor</i>        | EIW63959.1       | <i>Heliocybe sulcata</i>           | TFK49407.1       | <i>Suillus occidentalis</i>        | KAG1773126.1     |
| <i>Dichomitus squalens</i>        | XP_007359783.1   | <i>Gloeophyllum trabeum</i>        | XP_007867945.1   | <i>Suillus placidus</i>            | KAG1783737.1     |
| <i>Polyporus arcularius</i>       | TFK88646.1       | <i>Laetiporus sulphureus</i>       | KZT10254.1       | <i>Suillus americanus</i>          | KAG2044207.1     |
| <i>Polyporus brumalis</i>         | RDX51874.1       | <i>Daedalea quercina</i>           | KZT70440.1       | <i>Suillus subalutaceus</i>        | XP_041248104.1   |
| <i>Lactarius quietus</i>          | KAF8274751.1     | <i>Lentinus tigrinus</i>           | RPD65725.1       | <i>Suillus subaureus</i>           | XP_041199417.1   |
| <i>Russula ochroleuca</i>         | KAF8485787.1     | <i>Polyporus brumalis</i>          | RDX54732.1       | <i>Suillus cothurnatus</i>         | KAG2149799.1     |
| <i>Russula emetica</i>            | KAF8501388.1     | <i>Dentipellis</i> sp.             | KAA1473026.1     | <i>Suillus lakei</i>               | KAG1757371.1     |
| <i>Peniophora</i> sp.             | KZV64376.1       | <i>Russula ochroleuca</i>          | KAF8480159.1     | <i>Suillus bovinus</i>             | XP_041307276.1   |

|                              |                |                          |              |                                  |                |
|------------------------------|----------------|--------------------------|--------------|----------------------------------|----------------|
| <i>Pyrrhoderma noxium</i>    | PAV16546.1     | <i>Russula emetica</i>   | KAF8491911.1 | <i>Suillus variegatus</i>        | KAG1834565.1   |
| <i>Ramaria rubella</i>       | KAF8591094.1   | <i>Lactarius quietus</i> | KAF8271296.1 | <i>Suillus tomentosus</i>        | KAG1866257.1   |
| <i>Exidia glandulosa</i>     | KZV97461.1     | <i>Peniophora</i> sp.    | KZV74202.1   | <i>Suillus hirtellus</i>         | KAG2062054.1   |
| <i>Clavulina</i> sp.         | KAF8309935.1   | <i>Clavulina</i> sp.     | KAF8318757.1 | <i>Suillus discolor</i>          | XP_041298324.1 |
| <i>Cantharellus anzutake</i> | KAF8339827.1   | —                        | —            | <i>Suillus plorans</i>           | XP_041164869.1 |
| <i>Trichosporon asahii</i>   | XP_014181037.1 | —                        | —            | <i>Suillus fuscotomentosus</i>   | XP_041220431.1 |
| <i>Phaffia rhodozyma</i>     | CDZ98541.1     | —                        | —            | <i>Xerocomus badius</i>          | KAF8551619.1   |
| —                            | —              | —                        | —            | <i>Gyrodon lividus</i>           | KAF9229508.1   |
| —                            | —              | —                        | —            | <i>Paxillus ammoniavirescens</i> | KAF8845261.1   |
| —                            | —              | —                        | —            | <i>Polyporus brumalis</i>        | RDX56030.1     |
| —                            | —              | —                        | —            | <i>Polyporus arcularius</i>      | TFK94363.1     |
| —                            | —              | —                        | —            | <i>Lentinus tigrinus</i>         | RPD63103.1     |
| —                            | —              | —                        | —            | <i>Daedalea quercina</i>         | KZT74771.1     |
| —                            | —              | —                        | —            | <i>Trametes coccinea</i>         | OSD06069.1     |
| —                            | —              | —                        | —            | <i>Trichosporon asahii</i>       | XP_014180072.1 |

**Note:** “\*”: Strains and amino acids used to predict 3D structure of proteins.

**Table S7.** The proteins with similar 3-D structures to the reported proteins of HCS, AAR and SDH in PDB database.

| HCS in <i>F. velutipes</i> |          |      |       |       | AAR in <i>L. bicolor</i> |          |      |       |       | SDH in <i>F. velutipes</i> |          |      |       |       |
|----------------------------|----------|------|-------|-------|--------------------------|----------|------|-------|-------|----------------------------|----------|------|-------|-------|
| PDB                        | TM-score | RMSD | IDEN  | Cov   | PDB                      | TM-score | RMSD | IDEN  | Cov   | PDB                        | TM-score | RMSD | IDEN  | Cov   |
| 6ktqA                      | 0.837    | 1.09 | 0.355 | 0.847 | 4zxhA                    | 0.754    | 1.82 | 0.203 | 0.765 | 2qrlA                      | 0.984    | 0.35 | 0.543 | 0.986 |
| 6e1jA                      | 0.786    | 1.91 | 0.276 | 0.821 | 6mfzA                    | 0.538    | 3.66 | 0.237 | 0.581 | 1pjcA                      | 0.747    | 3.36 | 0.168 | 0.870 |
| 3figB                      | 0.698    | 3.35 | 0.156 | 0.769 | 2vsqA                    | 0.511    | 5.70 | 0.160 | 0.598 | 1f8gA                      | 0.709    | 3.38 | 0.179 | 0.829 |
| 4ov4A                      | 0.683    | 3.15 | 0.221 | 0.754 | 6n8eA                    | 0.500    | 5.20 | 0.162 | 0.577 | 1m2wA                      | 0.430    | 5.67 | 0.090 | 0.630 |
| 3ivtB                      | 0.658    | 3.35 | 0.694 | 0.735 | 4zxjA                    | 0.452    | 4.70 | 0.170 | 0.507 | 1gz3A                      | 0.426    | 4.70 | 0.107 | 0.554 |
| 3bliA                      | 0.623    | 1.65 | 0.252 | 0.649 | 5u89A                    | 0.356    | 6.39 | 0.155 | 0.425 | 1p0fA                      | 0.418    | 5.47 | 0.106 | 0.584 |
| 3a9iA                      | 0.619    | 2.54 | 0.545 | 0.659 | 1ry2A                    | 0.346    | 3.89 | 0.156 | 0.375 | 1hrkA                      | 0.416    | 5.50 | 0.081 | 0.601 |
| 3rmjA                      | 0.609    | 1.96 | 0.268 | 0.638 | 2d1rA                    | 0.345    | 3.31 | 0.153 | 0.368 | 1pl6A                      | 0.406    | 5.45 | 0.117 | 0.565 |
| 6ndsA                      | 0.565    | 2.61 | 0.185 | 0.616 | 1amuA                    | 0.343    | 2.62 | 0.260 | 0.357 | 1u1uA                      | 0.404    | 6.37 | 0.033 | 0.644 |
| 2cw6A                      | 0.553    | 2.25 | 0.203 | 0.595 | 1mdbA                    | 0.337    | 3.12 | 0.178 | 0.356 | 1gcaA                      | 0.402    | 5.47 | 0.070 | 0.573 |

**Note:** “PDB”: Protein Data Bank database. “TM-score”: Template Modeling score. “RMSD”: RMSD is the RMSD between residues that are structurally aligned by TM-align. “IDEN”: IDEN is the percentage sequence identity in the structurally aligned region. “Cov”: Cov represents the coverage of the alignment by TM-align.

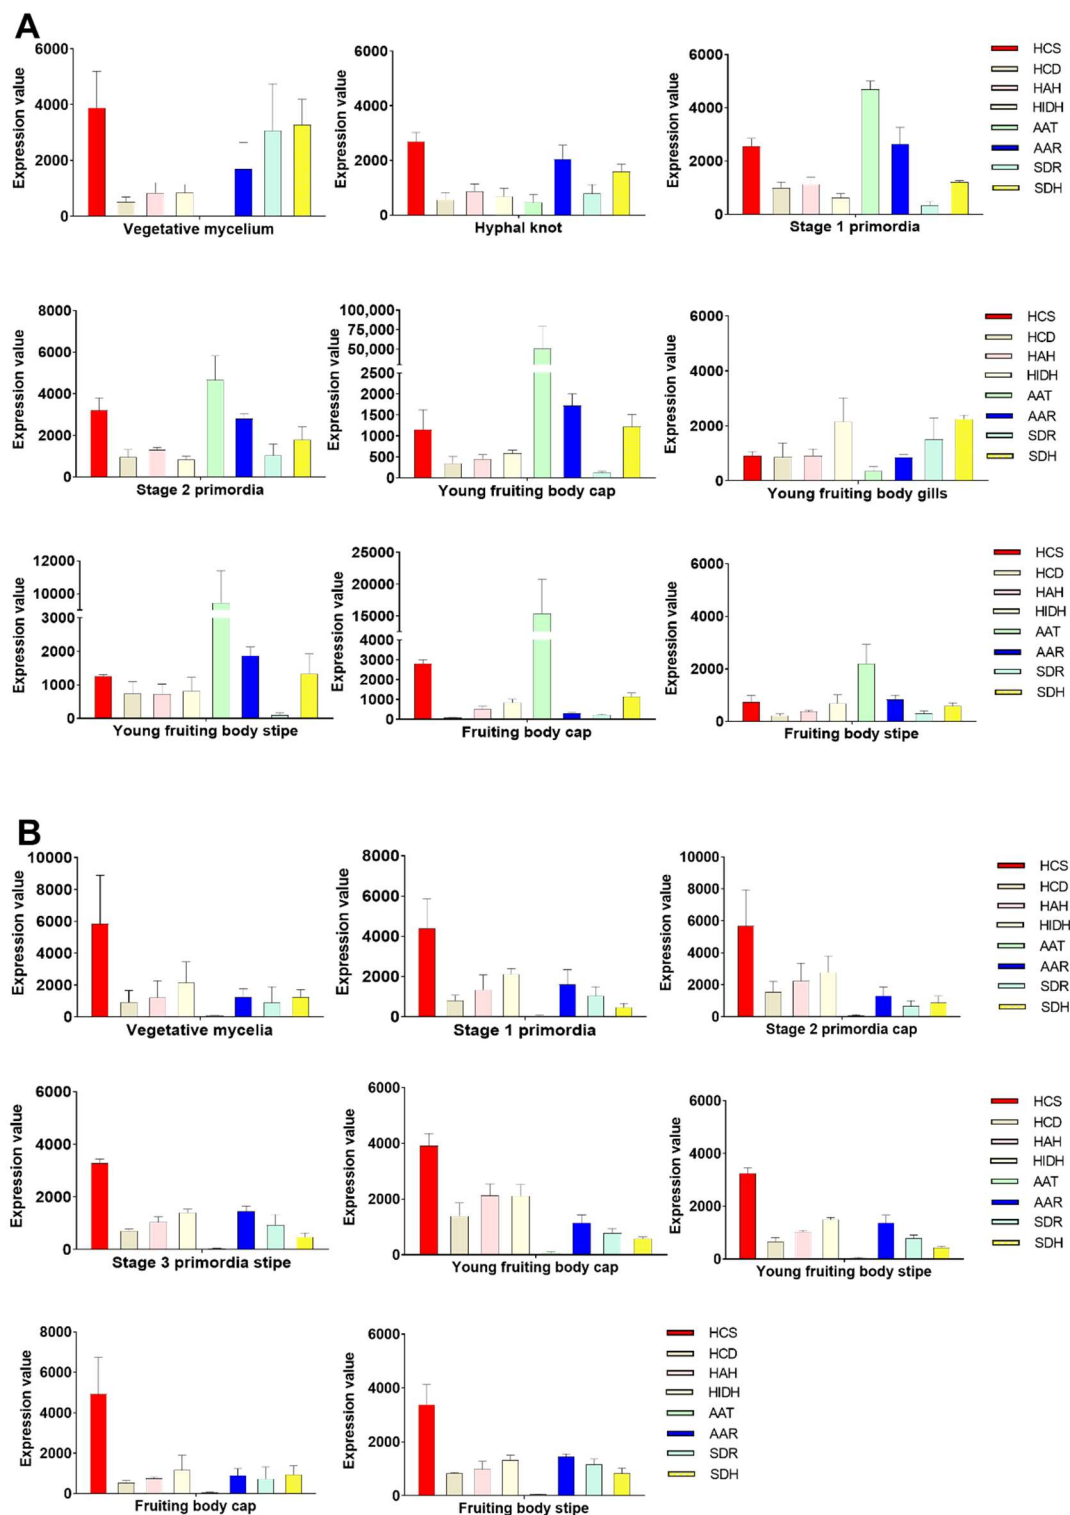

**Figure S1.** Expression levels of the genes of eight enzymes involved in AAA pathway in different development stages by RNA-seq analysis in *Coprinopsis cinerea* and *Lentinus tigrinus*. (A) Expression levels of the genes in different development stage in *C. cinerea*. (B) Expression levels of the genes in different development stage in *L. tigrinus*. (The RNA-seq data are from K. Krizsan et al. 2019)

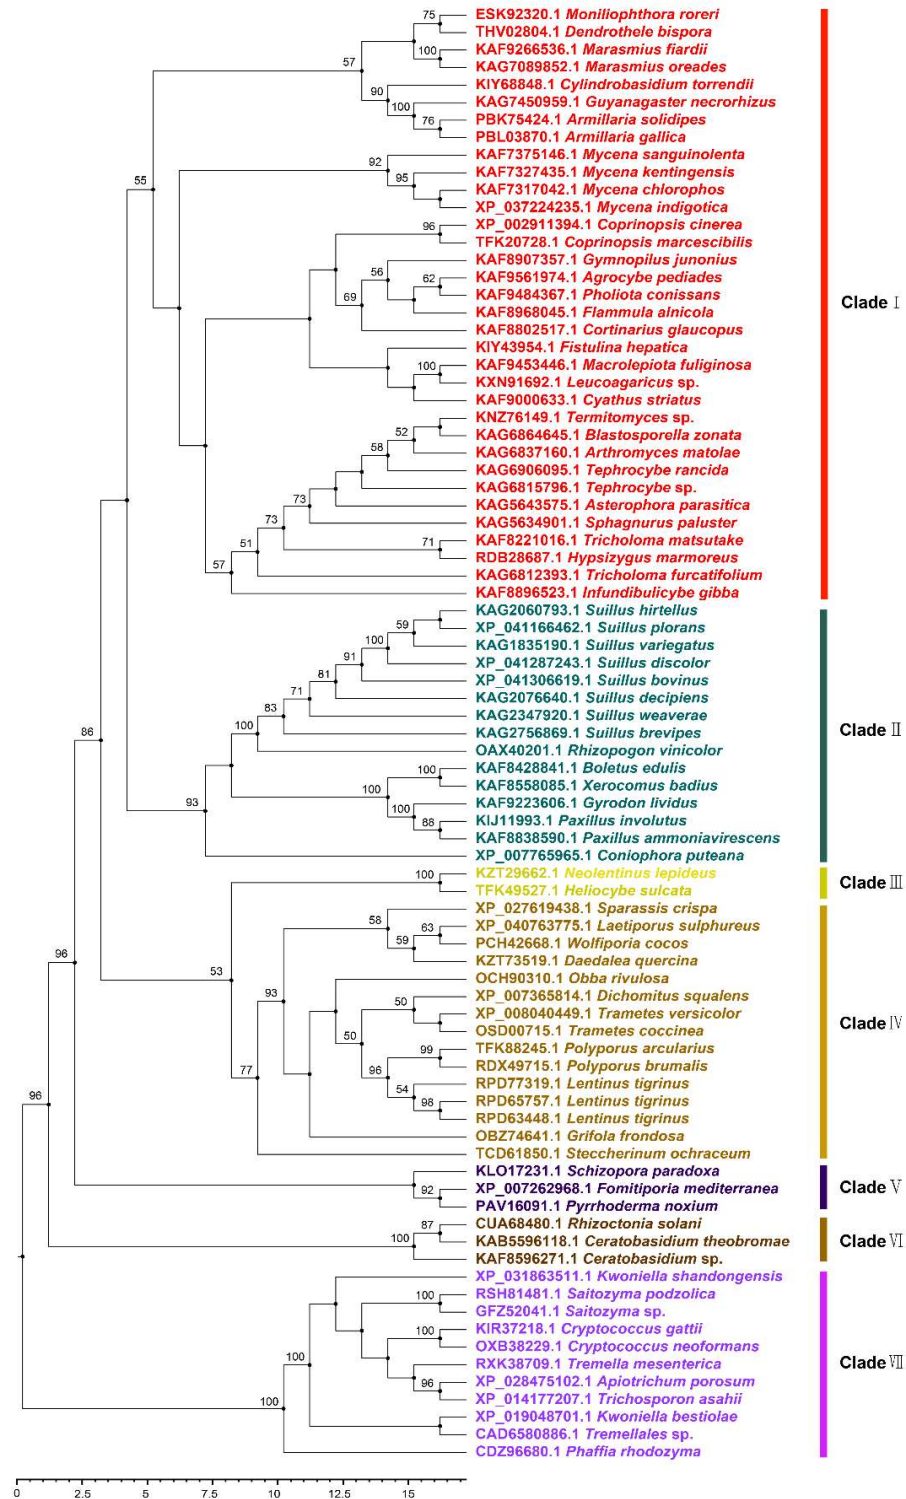

**Figure S2.** Phylogenetic tree of HAH in Agaricomycetes with Tremellomycetes as outgroup. MP bootstrap values ( $\geq 50\%$ ) of each clade are indicated at nodes. Scale bar in the upper left indicates substitutions per site. (Clade I : Agaricales; Clade II : Boletales; Clade III: Gloeophyllales; Clade IV: Polyporales; Clade V : Hymenochaetales; Clade VI: Cantharellales; Clade VII: Tremellomycetes)



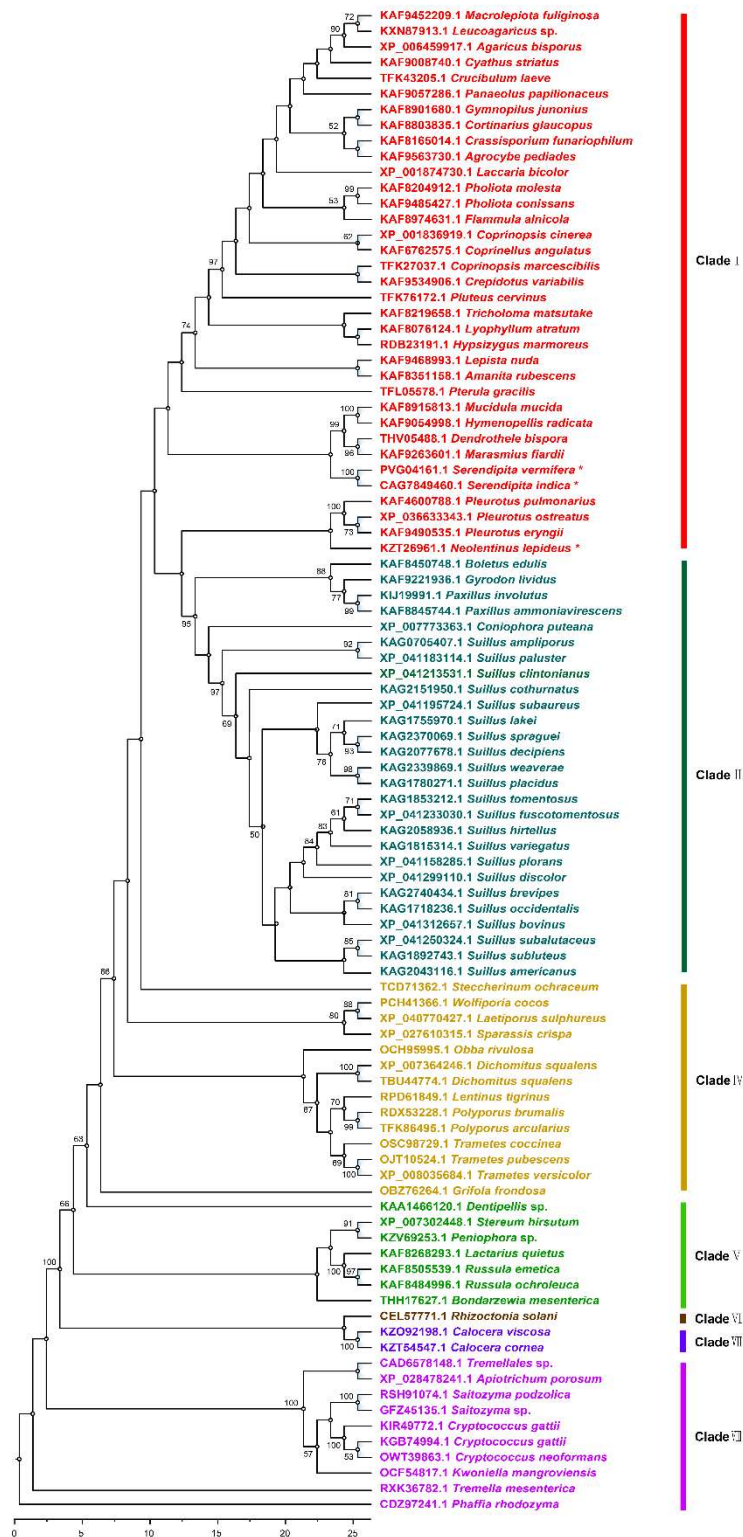

**Figure S3.** Phylogenetic tree of HIDH in Agaricomycetes with Tremellomycetes as outgroup. MP bootstrap values ( $\geq 50\%$ ) of each clade are indicated at nodes. Scale bar in the upper left indicates substitutions per site. (Clade I : Agaricales; Clade II : Boletales; Clade III : Polyporales; Clade IV : Russulales; Clade V : Cantharellales; Clade VI : Dacrymycetes; Clade VII: Tremellomycetes)

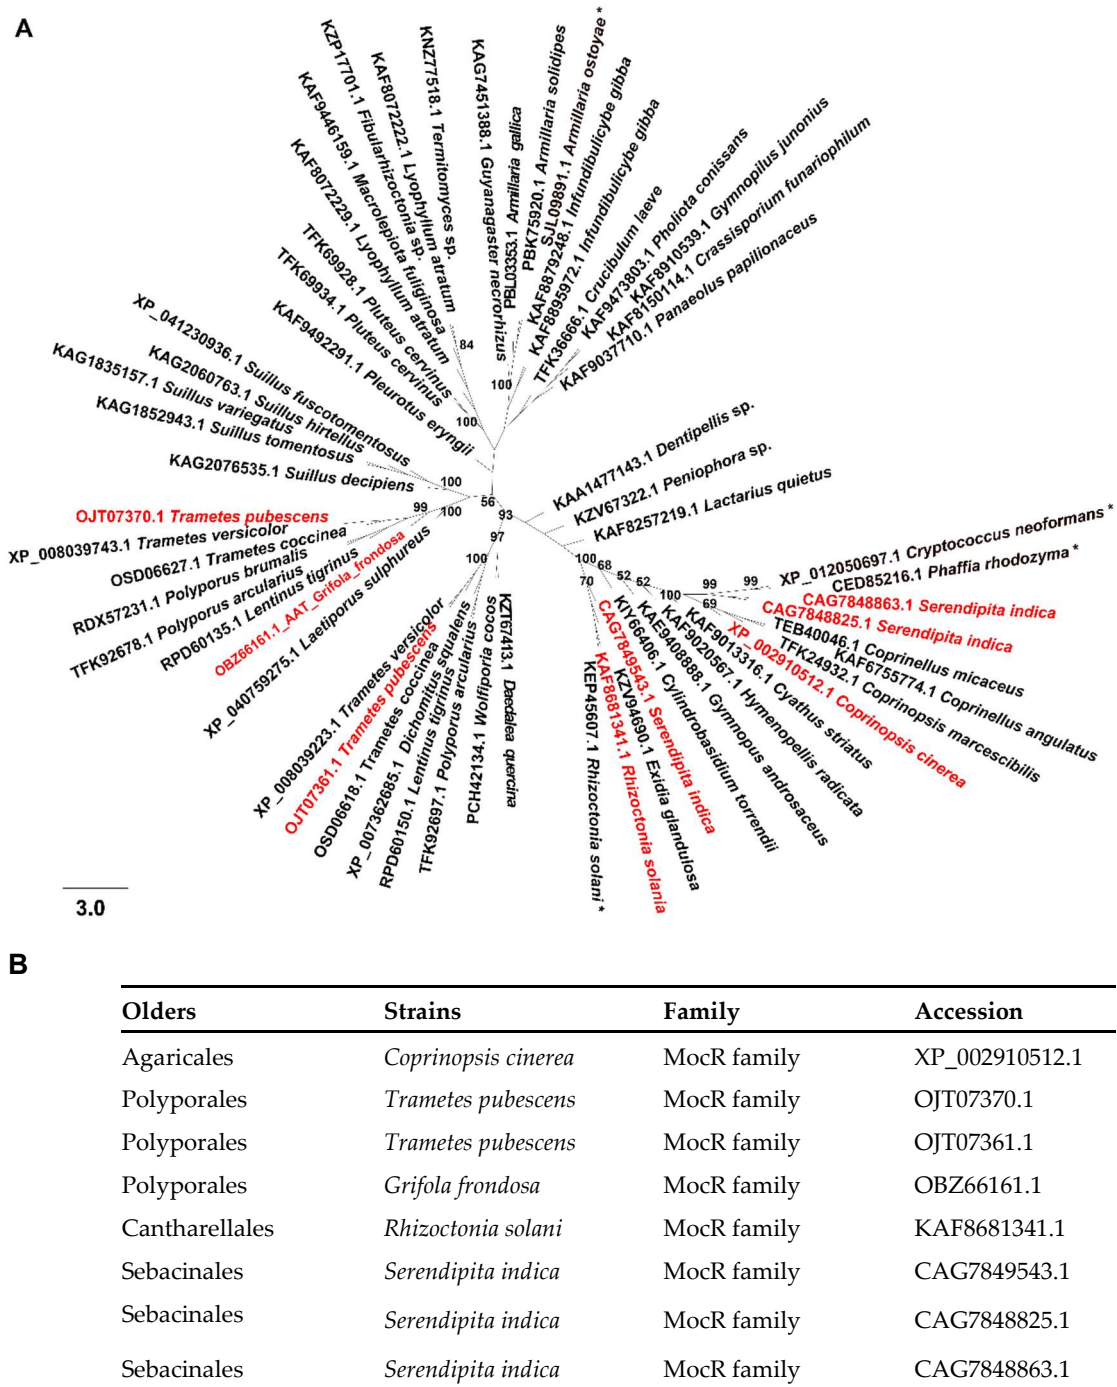

**Figure S4.** Phylogenetic tree of AAT in Agricomycetes. (A). ML tree based on AAT amino acid sequences of 59 strains. MP bootstrap values ( $\geq 50\%$ ) of each clade are indicated at nodes. Scale bar in the upper left indicates substitutions per site. (B). The reported  $\alpha$ -aminoacidate aminotransferases in Agricomycetes.

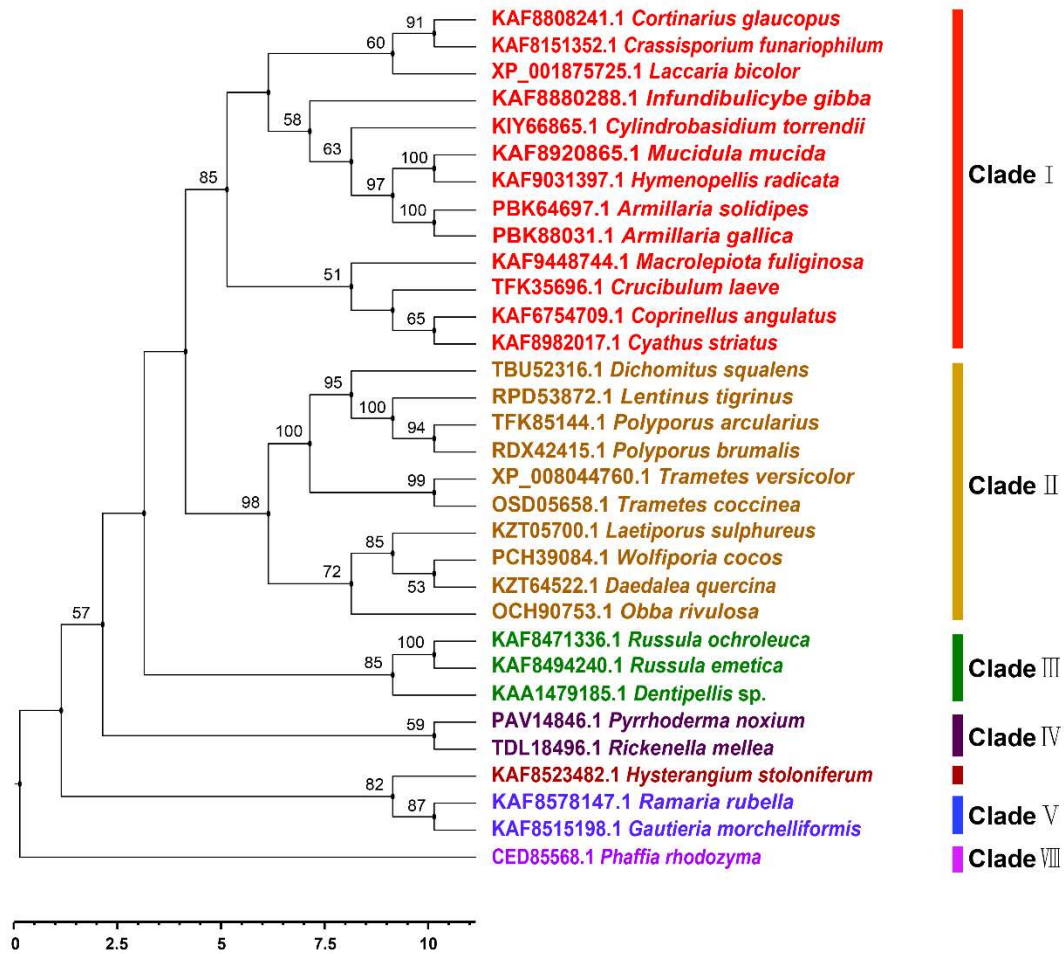

**Figure S5.** Phylogenetic tree of SDR in Agaricomycetes with Tremellomycetes as outgroup. MP bootstrap values ( $\geq 50\%$ ) of each clade are indicated at nodes. Scale bar in the upper left indicates substitutions per site. (Clade I: Agaricales; Clade II: Polyporales; Clade III: Russulales; Clade IV: Hymenochaetales; Clade V: Hysterangiales; Clade VI: Gomphales; Clade VII: Tremellomycetes)



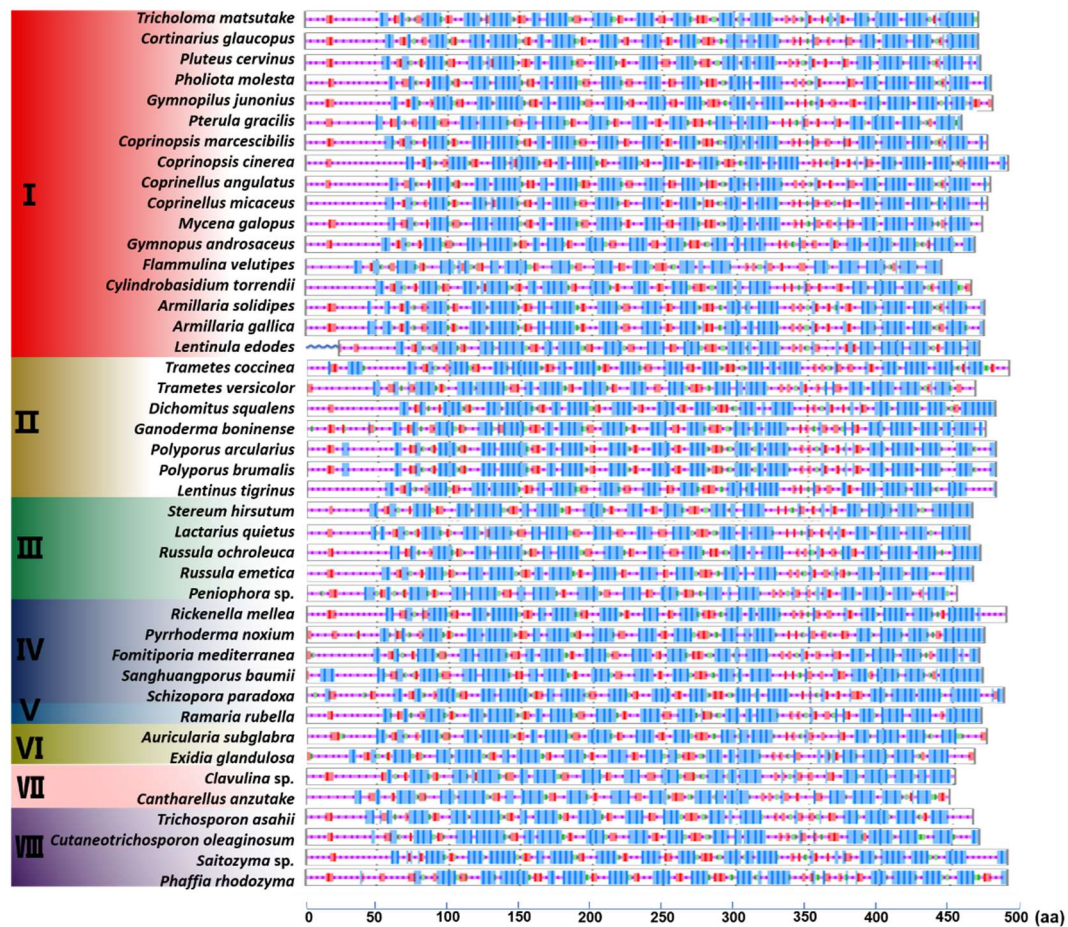

**Figure S6.** Characteristics of the secondary structures of HCS in Agaricomycetes. “Blue: Alpha-helix, Red: Extended strand, Green: Beta turn, Golden: Random coil” (I: Agaricales, II: Polyporales, III: Russulales, IV: Hymenochaetales, V: Gomphales, VI: Auriculariales, VII: Cantharellales, VIII: Tremellomycetes).

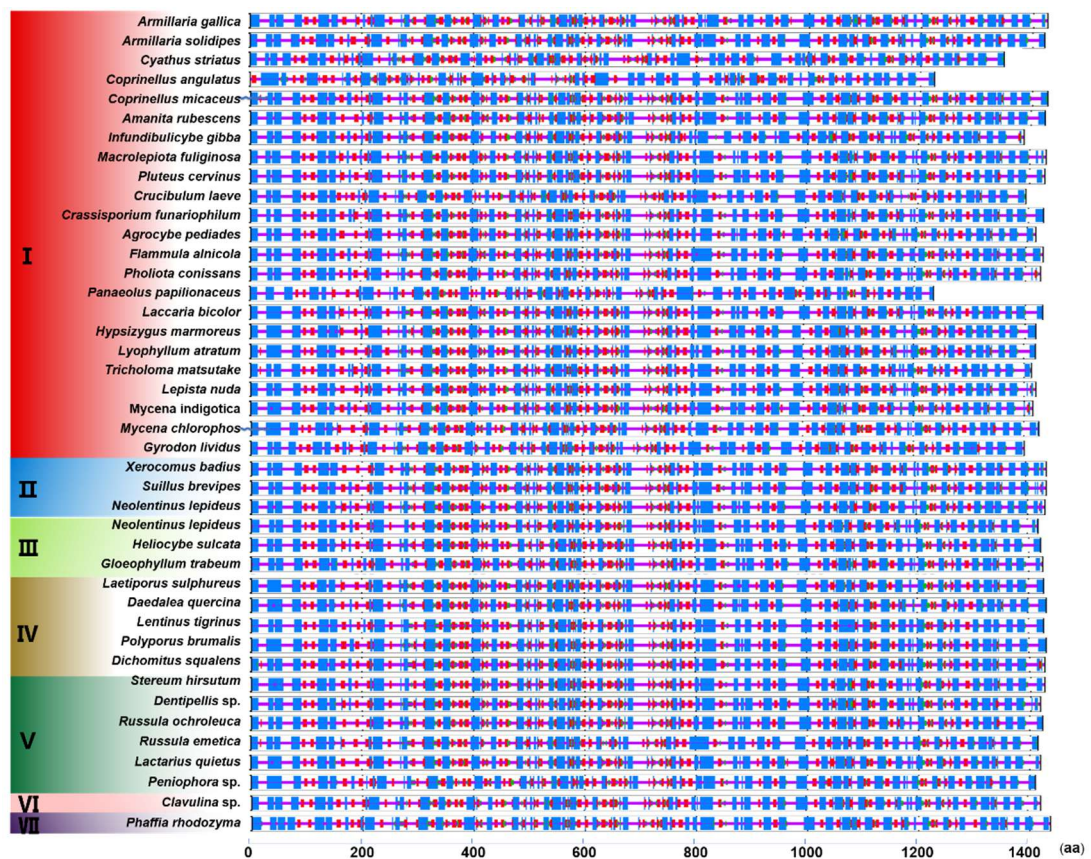

**Figure S7.** Characteristics of the secondary structure of AAR in Agaricomycetes. “Blue: Alpha-helix, Red: Extended strand, Green: Beta turn, Golden: Random coil” (I: Agaricales, II: Boletales, III: Gloeophyllales, IV: Polyporales, V: Russulales, VI: Cantharellales, VII: Tremellomycetes)



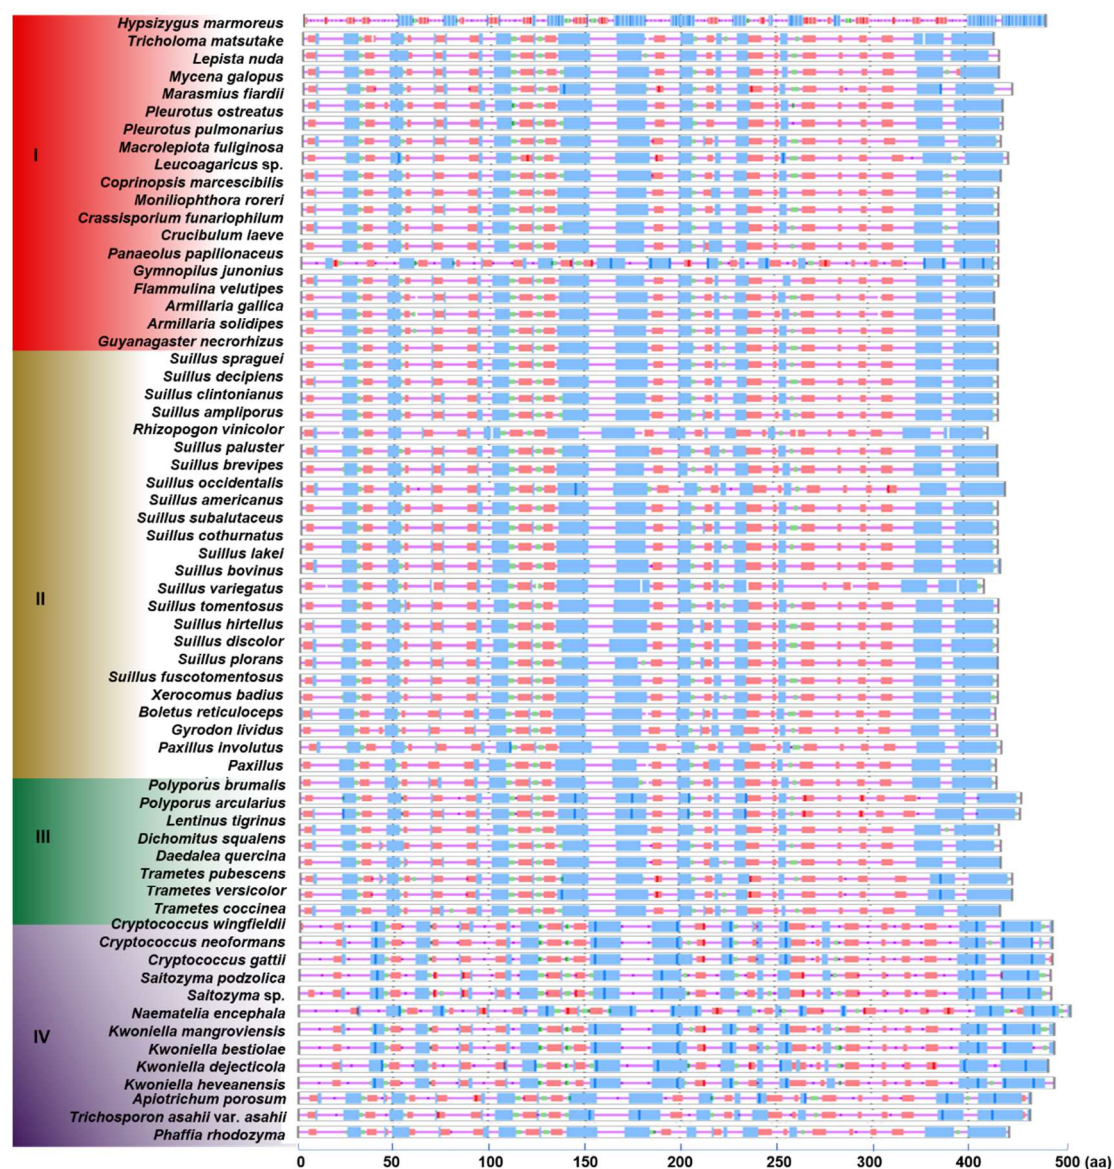

**Figure S8.** Characteristics of the secondary structure of SDH in Agaricomycetes. “Blue: Alpha-helix, Red: Extended strand, Green: Beta turn, Golden: Random coil” (I: Agaricales, II: Boletales, III: Polyporales, IV: Tremellomycetes)

# Ser-915

|                                                             |                                                                                                                             |
|-------------------------------------------------------------|-----------------------------------------------------------------------------------------------------------------------------|
| 1. <i>Saccharomyces cerevisiae</i> S288C (NP_009673.1)      | PLNPNGKVDKPKLQFFTPKQLNLVAENTVSETD---DSQFTINVEREVRDLWLSILPTKPAVSVPDDSFDDLGGHSILATKMHFTLKKKLQVDPLGTFIKYPTIKAFAAEIDRIKSSG-G    |
| 2. <i>Laccaria bicolor</i> S238N-H82 (XP_001879618.1)       | PLNPNGKIDKPALPFPDTAQASYAAPPTR-----KASTTEETMCSLWANILPNAPKPIPLDESFFDLGGHSILATRLIFEIRKVFVVSAPLGLIFEQPTISGLVNAVDAALRNADLG       |
| 3. <i>Armillaria gallica</i> (PBK98805.1)                   | PLNPNGKIDKPALPFPDTAQSAATAAPATG-----KATSTEEKMRELWSKILPNAPHPLPQESFFDLGGHSILATRLIFEIRKTFVVDAPLGLIFDEPTISGLVKAVEALRNADLG        |
| 4. <i>Armillaria solidipes</i> (PBK70829.1)                 | PLNPNGKIDKPALPFPDTAQSAATAAPATG-----KATSTEEKMRELWSKILPNAPHALPLEESFFDLGGHSILATRLIFEIRKTFVVDAPLGLIFDEPTISGLVKAVEALRNADLG       |
| 5. <i>Coprinellus micaceus</i> (TEB29768.1)                 | PLNPNGKIDKPALPFPDTAQLTFTAPVVD-----KASPTESMRLLWATILPNAPQPIPLDESFFDLGGHSILATRLIFEIRKQFVVDAPLGLIFDEPTIAGLAKSIDGLRNADLG         |
| 6. <i>Amanita rubescens</i> (KAF8345359.1)                  | PLNPNGKIDKPALPFPDTAQATLGA PPPTR-----QASSTEKILENIWAAILPNAPQPIPFDESFFDLGGHSILATRLVFIKRVFLVNAPLGLIFEQPTISGLAGAISALKNADLG       |
| 7. <i>Pluteus cervinus</i> (TFK71908.1)                     | PLNPNGKIDKPALPFPDITVQAATVGSVQSQ-----KANSTEEHRTIWSSILPNAPQPIPLDESFFDLGGHSILATRLIFEIRKVFVVDAPLGLIFEQPTISGLVSAVDALRNADLG       |
| 8. <i>Crucibulum leave</i> (TFK37590.1)                     | PLNPNGKVDKPKALPFPDTAQASYAAPASFP-----HKASSTEEIMRTLWSSILPNAPQPIPLDESFFDLGGHSILATRLIFEIRKVFVVDAPLGLIFEQPTITGLVQAVDILRNGDLG     |
| 9. <i>Crassisporium funariophilum</i> (KAF8157006.1)        | PLNPNGKIDKPALPFPDTAQASYAAPAPS-----AGANSTEATHQSIWTSILPNAPQPIPTDESFFDLGGHSILATRLIFEIRKVFVVDAPLGLIFEQPTISGLVKAVDALRNAYLG       |
| 10. <i>Pholiota molesta</i> (KAF8180379.1)                  | PLNPNGKIDKPALPFPDTAQAS-----PTEITMQNIWAAILPNAPKPIPSDESFFDLGGHSILATRLIFEIRKMFVIDAPLGLIFEQPTIAGLVEAVDALRNGDLG                  |
| 11. <i>Lyophyllum atratum</i> (KAF8067844.1)                | PLNPNGKIDKPALPFPDITTAAMIA PSAG-----KGTSTEAHRTIWAAILPNAPQVPSPDESFFDLGGHSILATRLIFEIRKVFVVDAPLGLVFDQPTIEGLVRAVDALRNADLG        |
| 12. <i>Tricholoma matsutake</i> 945 (KAF8223431.1)          | PLNPNGKIDKPALPFPDITVQAVSTAPLPD-----HVSSTEKIMQDIWSNIPNAPQPIPLDESFFDLGGHSILATRLIFDIRKIFVVDAPLGLVFDQPTIKGLVNAVDAALRNADLG       |
| 13. <i>Gyrodon lividus</i> (KAF9226319.1)                   | PLNPNGKIDKPALPFPDTAAHVVTHAENKAASNGAKTRITTSPTTEKLCSIWAEVLNLPDITPLDESFFDLGGHSILATRLIFEIRKVFVVEAPLGLIFSQPTISGLAAAIIDALRDPDFG   |
| 14. <i>Xerocomus badius</i> (KAF8553785.1)                  | PLNPNGKIDKPALPFPDTAAHVVTHAEKKAATKGNKKRVISPTTEKLCSIWAEVLNPPETIPLDENFFDLGGHSILATRLIFEIRKVFVVEAPLGLIFAQPTISGLAAAVDILRDPDFG     |
| 15. <i>Suillus brevipes</i> Sb2 (KAF3875411.1)              | PLNPNGKIDKPALPFPDTAQAAHAFSEPKKTVSG---RTASPTTEHRTIWAAILPNAPPTPIPFDESFFDLGGHSILATRLIFEIRKIFVVEAPLGLIFDQPTITGLASALDALRNPDFG    |
| 16. <i>Neolentinus lepideus</i> HHB14362 (KZT28090.1)       | PLNPNGKIDKPALPFPDTAAHAAADRPPQGE-----SQKAGATEEAIQAIWAQILPNAPSTVPLDESFFDLGGHSILATRLVFEIRKTFVVDAPLGLVFDKPTIAELASEVDILRNADLG    |
| 17. <i>Heliocybe sulcate</i> (TFK49407.1)                   | PLNPNGKIDKPALPFPDTAQAAASAERPRDE-----SQKASATEEAIRTIWAQILPNPPSPVPLDESFFDLGGHSILATRLIFEIRKAFVVEAPLGLVFDKPTIAELASEVDILRNADLG    |
| 18. <i>Gloeophyllum trabeum</i> ATCC 11539 (XP_007867945.1) | PLNPNGKIDKPALPFPDTAQAAASAERPRDGT----GEKASSTEEAIRAIWAKILPNAPSPVPLDESFFDLGGHSILATRLIFEIRKTFVVDAPLGLVFDKPTIGLAAEVDILRNADLG     |
| 19. <i>Laetiporus sulphureus</i> 93-53 (KZT10254.1)         | PLNPNGKIDKPALPFPDTAQSAFAE-HRG-----PAANPTEEAIRAIWTRILPNPPSPPLDESFFDLGGHSILATRLIFEIRKAFVVDAPLGLIFEKPTIGALAAVDELNRNADLG        |
| 20. <i>Daedalea quercina</i> L-15889 (KZT70440.1)           | PLNPNGKIDKPALPFPDTAQAAASAT-AQAG-----PAASPTEEAIRAIWTRVLPSPSPPIPLDESFFDVGGHSILATRLIFEIRKAFVVEAPLGLIFDKPTISELAAVDELNRNADLG     |
| 21. <i>Lentinus tigrinus</i> ALCF2SS1-6 (RPD65725.1)        | PLNPNGKIDKPALPFPDTAQAAASSEPARAG-----PAASPTEEAIRAIWTRILPNAPSPPLDESFFDLGGHSILATRLIFEIRKAFVVEAPLGLVFDKPTISQLADAVESMRNADLG      |
| 22. <i>Polyporus brumalis</i> (RDX54732.1)                  | PLNPNGKIDKPALPFPDTAQAAASSEPSRAG-----PAANPTEEAIRAIWTRILPNAPSPPLDESFFDLGGHSILATRLIFEIRKAFVVEAPLGLVFDKPTISQLADAVESMRNADLG      |
| 23. <i>Dentipellis</i> sp. KUC8613 (KAA1473026.1)           | PLNPNGKIDKPALPFPDTAQAAAVERPGAHAAA---APALNPTEKALQEIWTRILPNAPSPPLDESFFDLGGHSILATRLIFEIRKAFVVDAPLGLIFDEPTISGLAREVDALRNADLG     |
| 24. <i>Russula ochroleuca</i> (KAF8480159.1)                | PLNPNGKIDKPALPFPDTAQAVTYATRPQAG-----GRAASPTTEEMRTIWAIRILSSAPSPPIPFDENFFDLGGHSILATRLIFEIRKTFVVDAPLGLIFDKPTIAGLSRAIDSLRNADLG  |
| 25. <i>Russula emetica</i> (KAF8491911.1)                   | PLNPNGKIDKPALPFPDTAQAVTYATRPQAG-----SRAASPTTEEMRTIWAIRILSSAPSPPIPFDENFFDLGGHSILATRLIFEIRKTFVVDAPLGLIFDEPTISGLSKAIDSLRNADLG  |
| 26. <i>Lactarius quietus</i> (KAF8271296.1)                 | PLNPNGKIDKPALPFPDTAQASASDTRPQGR-----IHASSTEEEMRTIWAIRILSSAPSLIPLDESFFDLGGHSILATRLIFEIRKIFVVDAPLGLIFDNPTISALSTAIIDSLRNADLG   |
| 27. <i>Peniophora</i> sp. CONT (KZV74202.1)                 | PLNPNGKIDKPALPFPDTAAAAASASP---AHPNA---AQTLTPTEQRISSIWTSILPNAPQPIPLDESFFDLGGHSILATRLVFEIRKTFVVDAPLGLVFEQPTVKGLAGAIIDSLRNADLG |
| 28. <i>Clavulina</i> sp. FMI_390 (KAF8318757.1)             | PLNPNGKIDKPALPFPDTAAASALAPTAPT---AQAVKTTPTAAAIASIWAKLLPTPPFVPIDESFFDLGGHSILATRLIFEIRKTFVVEAPLGMVFDKPTIKQLAQEIDNLRDPHF       |

**Figure S9.** Multiple sequence alignment analysis of PCP domain in AAR from *Saccharomyces cerevisiae* with PCP domains from 27 species in Agaricomycetes.
